# Supplementary material for: Integrating network topology metrics into studies of catchment-level effects on habitat diversity
Source: Copernicus journal article supplement (doi:10.5194/hess-2018-89), 2018-03-19
Supplement: Supplementary file [file hess-2018-89-AC1-supplement.zip]

# Integrating network topology metrics into studies of catchment-level effects on ~~habitat diversity~~river characteristics

5 Eleanore L. Heasley<sup>1</sup>, Nicholas J. Clifford<sup>2</sup>, and James D. A. Millington<sup>1</sup>

<sup>1</sup> Department of Geography, King's College London, London, UK

<sup>2</sup> School of Social, Political and Geographical Sciences, Loughborough University, Leicestershire, UK

Correspondence to: Eleanore L. Heasley ([eleanore.heasley@kcl.ac.uk](mailto:eleanore.heasley@kcl.ac.uk))

**Abstract.** The spatial arrangement of the river network is a fundamental characteristic of the catchment, acting  
10 as a conduit between catchment-level effects and in-channel morphology and ecology. Yet river network  
structure is often simplified to reflect an up-to-downstream gradient of ~~in-channel features~~river characteristics,  
commonly represented by stream order. The aim of this study is to quantify network topological structure using  
~~new two network density metrics – one that represents network density over distance and the other over~~  
15 ~~elevation – that can easily be extracted from digital elevation models and so may be applied to any catchment~~  
~~across the globe. These metrics should~~ better account for the multi-dimensional nature of the catchment ~~than~~  
~~stream order~~ and ~~which are~~ functionally applicable across geomorphological, hydrological and ecological  
attributes of the catchment. The functional utility of the metrics ~~in explaining patterns of physical habitat~~  
~~diversity~~ is assessed ~~by appropriating monitoring data collected for regulatory compliance to explore patterns of~~  
20 ~~river characteristics in relation to network topology, in comparison to stream order. This method is applied to~~  
~~metrics are calculated for~~ four comparatively low-energy, anthropogenically modified catchments in the UK ~~and~~  
~~compared to using a physical habitat diversity score~~river characteristics derived from England's River Habitat  
Survey database. The patterns in river characteristics explained by network density metrics are compared to  
stream order as a standard measure of topology. The results indicate that the ~~new~~ network density metrics offer a  
25 richer, and functionally more-relevant description of network topology than stream order, highlighting  
differences in the density and spatial arrangement of each catchment's internal network structure. Correlations  
between the ~~new network density metrics~~ and ~~physical habitat diversity score~~river characteristics show that  
habitat quality score consistently increases with network density in all catchments as hypothesised. For other  
measures of river character – modification score, flow type speed and sediment size – there are varying  
30 responses in different catchments to the two network density metrics. ~~distance network density is positively~~  
~~related to maximum habitat diversity in three of the four catchments. There is also evidence that increased~~  
~~distance network density may reduce minimum habitat diversity in catchments with greater anthropogenic~~  
~~modification. When all catchments are combined, distance network density is positively correlated with~~  
~~maximum, mean and minimum habitat diversity. There are no few~~ significant correlations between ~~elevation~~  
~~network density~~stream order and ~~habitat diversity~~the river characteristics. ~~In all but the largest streams, there is~~  
35 ~~no significant relation between habitat diversity and stream order~~ highlighting the limitations of stream order in  
accounting for network topology. Overall, the results suggest that ~~distance network density~~ metrics are a more  
powerful ~~metric measures~~ which conceptually and functionally provides an improved method of accounting for  
the impacts of network topology on the fluvial system ~~exhibiting strong relationships with habitat diversity,~~  
~~particularly maximum habitat diversity.~~

## 1 Introduction

Rivers are integrators of many elements of their catchments (Dovers and Day, 1988). Consequently, integrated catchment management has long been seen as the gold-standard for river management and has been adopted in catchments across the globe (Newson, 2008). Research linking patterns of ~~in-channel features~~river reach characteristics to catchment-level functioning is currently focussed on characteristics of the terrestrial catchment such as land cover, geology and topography (e.g. Cohen et al., 1998; Harvey et al., 2008; Jusik et al., 2015; Naura et al., 2016; Richards et al., 1996; Richards et al., 1997). Yet, ‘hot-spots’ of activity within catchments are identified based on the hydrological connectivity of the catchment (Newson, 2010), a characteristic that is often neglected by catchment-level studies. This missing component of the catchment is critical for true integrated catchment management as the impacts of key management features (e.g. water, channel, land, ecology and human activity) are transmitted throughout the river network (Downs et al., 1991). By investigating the impacts of hydrological connectivity on river form and function, our understanding of catchment-functioning can become more holistic and beneficial to catchment management.

Effective catchment management rests not only on improving scientific understanding of river form and function across multiple scales, but also on better integration between the key disciplines of catchment studies: geomorphology, hydrology and ecology. This type of interdisciplinary approach is critical for understanding complex multi-causal relationships in river systems (Dollar et al., 2007). However, catchment connectivity is parametrised differently by different disciplines based on their interests. The discipline of geomorphology focusses on characterising the morphometry of the catchment, either using general variables which are continuous across the landscape (e.g. elevation, slope, curvature etc.) or specific variables which represent individual features such as catchments (e.g. drainage density, shape, area) or streams (e.g. stream order, stream length) (Evans and Minár, 2011). Hydrology focusses on how the catchment influences hydrograph and flood peak timing and magnitude. Methods, such as Geomorphic Instantaneous Unit Hydrograph (Rodriguez-Iturbe and Valdes, 1979), focus on predicting the travel time of water reaching channels and travelling downstream based the morphology of the catchment, drainage network and precipitation. Aquatic ecology takes a network-centric approach, utilising dendritic ecological networks (Peterson et al., 2013). This method aims to take a spatially continuous view of rivers (Fausch et al., 2002) in order to appreciate the influence of flow and location in the network on discrete sites chosen for ecological sampling. Spatial statistical stream network models based on the branching of the network (Ver Hoef and Peterson, 2010) are shown to be more accurate than a standard Euclidean distance kriging model, yet only worthwhile if data sites are distributed across the network and are spatially correlated (Peterson et al., 2013). Alternate methods for exploring relationships between network structure and ecological functioning are also based on Euclidean distance along the network (Ver Hoef and Peterson, 2010).

Each discipline represents the elements of the catchment critical to their field, focussing on describing catchment form, catchment flow responses and ecological responses. However, the geomorphology, hydrology and ecology of the catchment are interconnected across spatial and temporal dimensions in the fluvial hydrosystem (Petts and Amoros, 1996). We argue that the overlap between disciplinary methods can be utilised to create a metric to represent the catchment that is meaningful across all disciplines and offers increased potential for effective catchment management utilising a multi-or interdisciplinary approach.

This paper ~~develops integrated~~~~repurposes~~ metrics ~~that focus, focussing~~ on the topology of the river network ~~for a novel application; to assess as~~ the key link between the catchment and ~~in-channel~~~~reach-level~~ functioning. The metrics represent network density variation within catchments and have functional applications across the fields of geomorphology, hydrology and ecology (Sect. 1.1). The impact of internal network structure on ~~physical habitat diversity~~ patterns of river characteristics within catchments are explored by utilising datasets that are collected for regulatory purposes, with areas of higher network density likely to support ~~higher habitat diversity~~greater river quality and diversity (Sect. 1.2). The utility of the ~~new~~ topological metrics is compared against stream order; a classic but over-simplified method of accounting for network topology. The ~~new~~ topology metrics are calculated for catchments with comparatively ~~lower~~ energy ~~reaches~~ and that are influenced by anthropogenic modification as much of the previous evidence for increases in diversity from high densities of links has been from highly-erosive mountainous catchments.

## 1.1 Quantifying the river network at different scales and dimensions ~~Network topology~~

River network structure, or network topology, is one way to conceptualise the integrated transport of water, sediment and nutrients from the upstream catchment to downstream reaches. The spatial arrangement of links (river channels) and nodes (confluences) concentrates the catchment effect in some areas of the landscape making network topology a useful archetype of catchment functioning (Gupta and Mesa, 1988).

Drainage density (the total length of the network divided by catchment area) is most commonly used to compare the amount of the catchment covered by river channels, but this fails to quantify spatial variation within catchments, and so offers only a partial means for functionally assessing catchment similarities and differences. To represent within catchment network structure stream order (Strahler, 1957), ordering river links along an up-to-downstream gradient based on their upstream connectivity (Fig. 1a), is also commonly used. However, stream order does not account for the spatial arrangement of links, only their relative position in the distance dimension of the catchment. Conceptualising the catchment in this one-dimension leads also to over-simplification, for example, first order streams are often thought of as upland headwater streams, furthest away from the river mouth, yet often first order streams are tributaries to high-order, lowland streams with different characteristics than upland streams.

This paper argues that the spatial arrangement of links within catchments must be considered across the distance *and* height of the catchment to obtain a full three-dimensional appreciation of catchment effect through network topology. Two methods from the field of hydrology - network width function (NWF; Kirkby, 1976) and link concentration function (LCF; Gupta et al., 1986) - offer increased dimensionality by accounting for the width of the network (i.e. the number of links) at successive distances, for the NWF or elevations, for the LCF.

These methods quantify network topology within catchments with functional significance. NWF has hydrological application, representing the travel time of water through the network to predict the timing and magnitude of unit hydrographs and flood peaks (Rodriguez-Iturbe and Valdes, 1979) with a more functionally-specific method of than the traditional stream ordering approach (Gupta and Waymire, 1983). Extending applications beyond the field of hydrology, the timing and magnitude of the hydrograph has direct influence on instream ecology, controlling the formation, maintenance and disturbance of physical habitats (Bunn and Arthington, 2002). Longitudinal connectivity of water and sediment through the network is also one of the

multiple dimensions of the fluvial hydrosystems approach to catchment ecohydrology (Petts & Amoros, 1996), influencing the capacity for lateral and vertical connectivity and the development of the riparian corridor over time. LCF is less frequently applied in hydrograph prediction than NWF. However, it may better reflect catchment hydrology by incorporating the effect of gradient on the travel time of water, rather than the constant travel time suggested by NWF (Gupta et al., 1986). These metrics also have morphometric significance, reflecting the internal shape of the network by segmenting catchments into intervals to represent how network density changes within catchments (Stepinski and Stepinski, 2005).

This paper ~~adapts-repurposes~~ these ~~methods to produce two new~~ metrics to reflect network density as a feature of the catchment rather than as a method for hydrograph prediction. ~~Distance network density (adapted from modelled on the NWF) (Fig. 1b) and elevation network density (adapted from modelled on the LCF) (Fig. 1c).~~ These metrics allow for the comparison and quantification of network topological variation both within and between catchment with improved interdisciplinary and functional applicability than the stream ordering approach.

## 1.2 Network topology effects on in-channel river reach functioning

The topological structure of the river network configures the river ecosystem (Bravard and Gilvear, 1996) by impacting functioning at the reach and sub-reach scales. The distance dimension of the catchment, often represented by stream order (Fig. 1a), reflects up-to-downstream gradual changes exhibited by many in-channel features and species. It forms the basis of classic geomorphic models, highlighting the zones of sediment supply in the headwaters, sediment transfer in the mid-reaches and sediment storage near the outlet (Schumm, 1977). It is also a key component in classic ecological models such as the River Continuum Concept (Vannote et al., 1980) which describes gradual changes in grain-size, channel width, invertebrates, fish species and energy sources along the gradient. Both models suggest that diversity in in-channel morphology and biota may be highest in the mid-reaches as channels transition from erosional to depositional environments. The River Continuum Concept is a popular model but is critiqued for being too simplistic and for neglecting discontinuity introduced by changes at confluences (Perry & Schaeffer, 1987; Rice et al., 2001). Confluences, as nodes in the network, are associated with changes in hydrological, geomorphological (Best, 1987; Church & Kellerhals, 1978) and ecological (Kiffney et al., 2006; Rice et al., 2001) conditions and have therefore been termed biodiversity ‘hotspots’ (Benda et al., 2004b). ~~Components of physical habitats important for instream biota, such as substrate size, flow type and in-channel morphology, become increasingly diverse because of hydrological and sedimentological changes at confluences. For example, substrate size changes from coarse to fine downstream along each “sedimentary link” in the network creating step changes in sediment size, known as the Link Discontinuity Concept (Rice et al., 2001). Surface flow types, used to indicate the presence of physical biotopes (Rowntree, 1996), are also likely to become more diverse at confluences as the convergence of channels creates a number of different flow environments (Best, 1985) that result in different water surface topographies (Biron et al., 2002). The occurrence of channel features such as bars and boulders are also noted as impacts of confluences (Benda et al., 2004a).~~

Confluence impacts extend throughout the river network ~~The impact of confluences extends further than the immediate tributary junction,~~ with increased channel heterogeneity ~~diversity increased~~ in the tributary and main

channel upstream and downstream of the confluence (Rice, 2017). This has led to several theories relating to the impact of numerous confluences in the context of the wider network. The Link Discontinuity Concept shows the impact of confluences throughout the length on the main channel, creating step-changes in sediment size before fining continues downstream towards the next confluence along a “sedimentary link” (Rice et al., 2001). The Network Dynamics Hypothesis posits that catchments with higher drainage density, and thus more confluences, will have greater ~~channel~~instream heterogeneity (Benda et al., 2004b), despite drainage density failing to be a useful catchment characteristic for predicting local habitat features (Davies et al., 2000). ~~Not all confluences impact instream functioning (Rice, 1998) and studies suggest that confluences with similarly sized tributaries have the greatest impact on instream morphology (Benda et al., 2004a), the greatest flow diversity (Schindfessel et al., 2015), and greatest fish community diversity (Osborne and Wiley, 1992). The hypothesis also. The~~ Network Dynamics Hypothesis suggests that catchment shape will influence the impact of confluences, as more compact catchments will have more similarly sized tributaries (Benda et al., 2004b), which have the greatest impact on channel morphology (Benda et al., 2004a), the greatest flow diversity (Schindfessel et al., 2015), and greatest fish community diversity (Osborne and Wiley, 1992). ~~but in contrast, others have found that tributaries that differ most greatly in size have the most impact. For example, Jones and Schmidt (2016) suggest that high densities of small tributaries flowing into a large channel have been suggested to cause small, cumulative changes and within an area (Jones and Schmidt, 2016). These studies focus on the density of different sized confluences but alternate approach is that the position of confluences is key, for example, Milesi and Melo's (2013) study which concluded that small tributaries flowing into large channels in the peripheral regions of the catchment have the greatest impact on macroinvertebrate assemblages. distal regions of the catchment have more significant confluences.~~

Interestingly, there is little evidence of anthropogenic impacts at confluences in the literature but as confluences are proposed concentration points of catchment effects it seems likely that they may be focal points for anthropogenic impacts. For example, flood events may occur downstream of large confluences as flood peaks converge creating the need for flood defence measures (Depettris et al., 2000) and scour and erosion at confluence junctions (Best, 1986) increases the need for bed and bank protection. Also, sediment size at confluences is shown to increase in many studies (Church and Kellerhals, 1978; Knighton, 1980), but in tributaries whose watersheds are dominated by agricultural land uses, fine sediments may become dominant at confluences, potentially ~~reducing habitat diversity~~altering river functioning (Owens et al., 2005).

Many previous studies citing the impact of the network, specifically confluences, on river characteristics were conducted in highly-erosive, relatively natural environments (Network Dynamic Hypothesis, Benda et al. 2004b; Link Discontinuity Concept, Rice et al. 2001). Therefore, it will be interesting to assess the impact of network structure on river characteristics in catchments in England, a landscape that has undergone modification that has impacted catchment functioning for centuries (Macklin and Lewin, 2003).

## 2 Methods

### 2.1 Study sites

~~This study demonstrates the potential use of topological metrics for catchments with varying geologies and land uses in comparison to the highly erosive environments considered by previous studies. The four catchments are selected for testing the impact of network topology on river characteristics in England. The~~ catchments are from the Demonstration Test Catchment programme (Fig. 2) which are representative of 80% of soil and rainfall combinations in the United Kingdom (McGonigle et al., 2014). ~~This demonstrates the potential use of topological metrics for catchments with varying geologies and land uses.~~

The Avon and Wensum catchments have similar characteristics, both being dominated by chalk geology with lower average annual rainfall and a high percentage of arable farming land cover. In comparison, the Eden and Tamar are dominated by less permeable bedrock with higher average annual rainfall and a high percentage of grassland land covers. In terms of their morphometry, the Avon and Wensum both have an elongated shape and low drainage density. The Wensum is a low-relief catchment with a maximum elevation of 95 m. The Tamar has the smallest catchment area (928 km<sup>2</sup>) and is the most circular. The Eden is the largest catchment (2295 km<sup>2</sup>) with the highest maximum elevation (246 m).

### 2.2 Network topology metrics

Network topology metrics were calculated for each catchment using the 1:50,000 river network map, derived from both a Digital Terrain Model (DTM) and Ordnance Survey data (Moore et al., 1994). Anabranches and incorrectly digitised links in the network are ~~removed-identified~~ using RivEX (Hornby, 2010) ~~and removed~~. Removing anabranches was necessary as the topological metrics were designed for dendritic networks so multi-thread channels, either naturally occurring or artificial ditches, would distort the calculations. This resulted in a total of 448, 2812, 1516 and 532 links in the Avon, Eden, Tamar and Wensum, respectively.

Elevation data was extracted from the Integrated Hydrological DTM (Morris & Flavin, 1994), a 50x50\_m gridded elevation raster with a 10\_cm vertical resolution. Average elevation of each link and the distance from each link to the network outlet was extracted using RivEX (Hornby, 2010).

To extract a measure of network density that varies spatially within the catchment, each network is divided into 20 intervals, each of which ~~in turn~~ represent five percent of the total distance or highest elevation in the network (Fig. 2). The network is divided in this manner based on the methods of the NWF and LCF which have functional application to hydrograph prediction. Twenty intervals provides a relatively coarse sampling of the network, compared to the 100 intervals described by Stepinski and Stepinski (2005) when they adapted a morphometric variable, circularity ratio, to represent internal catchment elongation. Here, a total of twenty intervals is chosen so that most intervals contain links for the density calculation whilst ensuring the spatial distribution of network density within the catchment is characterised.

Distance network density was calculated following Eq. (1):

$$\text{Distance network density} = \frac{[n(d_0), \dots, n(d_i), \dots, n(d_N)]}{(d_N \times 0.05)} \quad (1)$$



where the number of links ( $n()$ ) within each 5% distance interval ( $d_i$ ) from the outlet ( $d_0$ ) to the maximum distance in the network ( $d_N$ ) normalised by the width of the interval ( $d_N \times 0.05$ ).

Elevation network density was calculated following Eq. (2):

$$\text{Elevation network density} = \frac{[n(z_0), \dots, n(z_i), \dots, n(z_N)]}{(z_N \times 0.05)} \quad (2)$$

where the number of links ( $n()$ ) within each 5% elevation interval ( $z_i$ ) from the outlet ( $z_0$ ) to the maximum height of the network ( $z_N$ ) normalised by the width of the interval ( $z_N \times 0.05$ ). Normalisation allows network densities to be compared between catchments controlling for differences in size and elevation as well as within catchments.

To assess the utility of the ~~new~~-multi-dimensional topology metrics in accounting for the spatial structure of the network, the metrics are compared to the one-dimensional Strahler stream order metric, extracted from the river network dataset using RivEX (Hornby, 2010).

### 2.3 ~~Physical habitat diversity score~~ River characteristics

The impact of network topology on channel functioning is explored using a broad-scale approach, i.e. adapting data collected for regulatory compliance to answer scientific questions. Adapting such datasets to scientific enquiry allows analysis to be conducted in many catchments across a wide spatial extent. There are many habitat monitoring methods across the globe, with 121 survey methods recorded in over 26 different countries (Belletti et al., 2015), so this method may be adapted to other countries.

This study utilises the River Habitat Survey (RHS; Raven et al., 1996), a regulatory dataset collected by England's Environment Agency, which is used to reflect ~~the river reach characteristics in channel functioning in the each~~ catchments. This dataset has been used to identify catchment effects on ~~habitats-river characteristics~~ in broad-scale studies by previous research (e.g. Harvey et al., 2008; Naura et al., 2016; Vaughan et al., 2013) but none have included the effects of network topology.

Since 1994, over 24,000 sites have been sampled in catchments across England and Wales, including the Avon ( $n=418$ ), Eden ( $n=398$ ), Tamar ( $n=189$ ) and Wensum ( $n=315$ ). Surveys were conducted at random sites within each 10 km<sup>2</sup> of England and Wales to ensure geographic coverage, however this produces sampling bias as streams in high density areas will be under represented in the dataset, which is acknowledged in this study and discussed below.

At each site, over 100 features are recorded along a 500m reach with 10 "spot-check" surveys conducted every 50m and a "sweep-up" survey conducted across the whole reach (see Raven et al. (1996) for details). Particular variables of interest that are hypothesised to be impacted by network structure can be calculated from the RHS observations ~~An individual score is assigned to each component of the survey based on the diversity of features recorded~~ (Table 1).

The Habitat Quality Assessment (HQA) and Habitat Modification Score (HMS) variables are both amalgamations of RHS observations with individual features given a score derived by expert opinion (see Raven et al., (1998) for more details). The scoring systems are subjective but HQA and HMS provide overviews

of channel condition that are widely applied for regulatory compliance. The scores are therefore included in this study to reflect how they may be impacted by network topology.

The remaining RHS variables are calculated directly from the RHS observation so are more objective. Sediment size is calculated as a reach average of spot-check observations using the same method as previous studies (Davenport et al., 2004; Emery et al., 2004; Harvey et al., 2008). Flow type speed was calculated in the same manner as sediment size using values of flow which represent an approximate flow velocity gradient defined in Davenport et al. (2004). These variables were chosen to reflect that dominant geomorphic processes occurring in each reach and due to the prominence of sediment size and flow type in defining physical habitats for instream biota (Rowntree, 1996). The variables are likely to be impacted by the density of the river network as they have been shown to be impacted by individual confluences. For example, channels are shown to become more geomorphologically heterogeneous (Benda et al., 2004a) and substrate size has been shown to coarsen at confluences (Rice et al., 2001). Surface flow types are also likely to become more diverse at confluences as the convergence of channels creates a number of different flow environments (Best, 1985) that result in different water-surface topographies (Biron et al., 2002).

It must be noted that the RHS dataset was collected for regulatory compliance and was not directly intended for scientific enquiry. Therefore, there is a limitation in the amount of detail that can be extracted about physical process as the observations recorded are an average across a 500m reach. Despite this, the wide spatial coverage of the dataset makes it a powerful tool allowing, in the case of this study, analysis to be conducted across multiple catchments with differing characteristics.

~~The individual score, derived by expert opinion, combine to form a Habitat Quality Assessment score which is used to determine the diversity and naturalness of the riparian zone at each site in accordance to regulatory policy. This study only considers in channel responses to network topology and calculates a physical habitat diversity score for each site following Eq. (3):~~

$$\text{Physical habitat diversity score} = \text{Flow type score} + \text{Substrate score} + \text{Channel features score} \quad (3)$$

~~where individual scores of flow type, substrate size and channel feature diversity (Table 1) are totalled.~~

For each distance and elevation interval created by the network topology metrics, ~~descriptive statistics (the mean, median, 90<sup>th</sup> percentile and 10<sup>th</sup> percentile) maximum and minimum physical habitat diversity score of each RHS variable was are~~ calculated. Despite the sampling bias towards less dense areas of the network, most distance and elevation intervals contained RHS sites (with only some low density intervals not containing RHS sites). ~~For distance or elevation intervals with less than three RHS sites, maximum and minimum values were removed.~~ This method is designed to account for natural variation and modification at individual RHS sites, in order to assess broad patterns of ~~habitat diversity~~ reach characteristics at the catchment level.

## 2.4 Statistical analysis

Analysis ~~was~~ conducted with all catchments combined into a single population to identify overall trends across all catchments, a method used in previous broad-scale studies. The analysis ~~was~~ also split into individual



catchments to identify how the relationship between network topology metrics and ~~physical-habitat~~  
diversity/river reach characteristics differed between catchments.

#### 2.4.1 ~~Spearman's Rho~~Kendall-Correlations

Correlation tests ~~were~~are used to determine the strength and direction of the association between ~~mean,~~  
~~maximum and minimum~~the descriptive statics of the RHS ~~habitat~~ variables and distance network density ~~and,~~  
elevation network density and stream order to ascertain how ~~habitat-diversity~~reach characteristics responds to  
network topology. ~~Spearman's Rho~~Kendall's correlation method was used as the ~~datasets~~ variables have non-  
normal distributions, a small sample size and tied data values (Helsel and Hirsch, 2002). The effect size of  
Kendall's ~~Tau~~ is lower than other correlation methods with strong correlations occurring with tau values greater  
than 0.7 (Helsel and Hirsch, 2002).

As multiple correlations are conducted, ~~f~~False ~~d~~Discovery ~~r~~Rate (Benjamini and Hochberg, 1995) corrections  
were applied to the p-values produced from the ~~Spearman's Rho~~Kendall correlations to reduce the risk of type I  
error. The ~~f~~False ~~d~~Discovery ~~r~~Rate method has been found to be more powerful than other procedures for  
controlling for multiple tests (Glickman et al., 2014).

#### 2.4.2 ~~Mann-Whitney U~~ tests

~~The correlations with the new network topology metrics are compared to habitat diversity variation between~~  
~~stream orders to identify whether the new topological metrics of network density examined here build on~~  
~~explanations of habitat diversity patterns by stream order. Pairwise Mann-Whitney U tests with False Discovery~~  
~~Rate corrections to the p-value threshold were conducted to identify which stream orders had distributions of~~  
~~habitat diversity that were statistically different from others.~~

### 3 Results

#### 3.1 Differences in network topology metrics between catchments

The topological metrics developed in this study show the internal structure of the network for each catchment.  
The separation of the catchments into distance and elevation intervals highlight-emphasises different features of  
the catchment. The distance intervals (Fig. 32a) are arranged longitudinally within the catchment, highlighting  
sub-basins within each catchment. The elevation intervals (Fig. 32b) have a radial arrangement, centring around  
the incised main channel of each catchment.

Distance network density (Fig. 3e) ~~reflects the~~is higher ~~numbers of links~~ in the ~~Eden and Tamar~~Eden  
(28.4±10.3) and Tamar (44.1±21.9) compared to the ~~Avon and Wensum~~Avon (4.7±1.9) and Wensum (6.8±0.7).  
However, interestingly the highest distance network density is recorded in the Tamar, the smallest catchment by  
area. The shape of the distance network density function reflects the internal shape of the network (Fig. 3a). For  
example, the Tamar has a peaked density distribution reflecting the circular shape of the catchment such that the  
majority of links are at 55%-65% distance from the catchment outlet. The Avon and Eden reflect similar internal  
network structures, both exhibiting a bimodal density distribution, despite the differences in the number of links  
in the catchments. The density distribution of the Wensum has a more complex internal distribution of links  
with multiple peaks in density.

Elevation network density (Fig. 3b) shows similar density distribution shapes to distance network density, with a unimodal distribution for the Tamar and multi-modal distributions in the other catchments. In contrast to distance network density, elevation network density shows the highest peaks in density in the Tamar ( $10.3 \pm 5.0$ ) and Wensum ( $10.1 \pm 4.3$ ), despite the Wensum having the ~~catchment with~~ lowest network elevation., and has lower values in the Avon ( $3.4 \pm 1.0$ ) and Eden ( $5.8 \pm 2.5$ ). The peak densities in the Wensum occur at similar positions in the elevation and distance intervals, whereas, the peaks in the other catchments are negatively skewed, showing the network density is highest at low-mid elevations.

~~The percentage of links classified as each stream order exhibit the same pattern across all catchments (Fig. 3e). Nearly half of the links in each catchment are classified as first order streams and the number of links declines exponentially towards the highest orders. Nearly half of the links in each catchment are classified as first order streams and the number of links declines exponentially towards the highest orders in all four catchments. There are weak correlations ( $\tau = -0.03$  to  $0.17$ ) between the three network topology metrics: distance network density, elevation network density and stream order. This suggests that the metrics are independent and reflect different aspects of river network topology.~~

### **3.2 ~~Physical habitat diversity~~ River characteristic relations with network topology metrics**

RHS sites in the Avon and Wensum have similar river characteristics. Both have lower habitat quality, high modification, fine sediment and slower flow types than the Eden and Tamar.

When all catchments are combined, there are significant ( $p < 0.05$  after p-value correction) correlations with almost all descriptive statistics for each RHS variable and distance network density (Fig. 4). There are consistently positive correlations with HQA and flow type speed and negative correlations with HMS and sediment size. There are fewer and weaker significant correlations with elevation network density (Fig. 4). The only significant correlations with stream order are with HMS which show negative correlations (Fig. 4)

There are numerous significant correlations between the network topology metrics and RHS variables for individual catchments, many of which were also shown to be significant after the correction to the p-value. The results show that catchments have different responses to the network topology metrics of distance network density and elevation network density. Distance network density only has significant correlations with the regulatory scoring variables (HQA and HMS) in the Eden and Tamar (Fig. 4). Elevation network density, however, has a wider array of significant correlations with the scoring variables, particularly HQA which shows subtle peaks and troughs reflecting the distribution of both network density metrics (Fig. 3a and 3b). HMS shows mostly negative correlations, with most significant correlations with elevation network density, apart from the Eden which has significant positive correlation across all HMS descriptive statistics (Fig. 4). Visually 10th percentile HMS is most variable to network density with peaks and troughs responding to the network density distributions (Fig. 3a and 3b).

For individual RHS features, the response to network topology varies between catchments (Fig. 4). The Avon has negative correlations between flow type speed and distance network density, with an evident drop in 10<sup>th</sup> percentile flow type speed associated with peaks in network density (Fig. 3a). The Eden and Tamar, however,

have positive correlations with mean and 90th percentile flow type speed for distance network density but negative correlations with median and 10<sup>th</sup> percentile elevation network density. The Wensum shows positive correlations between flow type speed and elevation network density. Sediment size has a consistent response to distance network density with the Eden and Wensum showing negative correlations with the sediment size (Fig. 4). For elevation network density, the Avon shows negative correlations with sediment size, whereas the Tamar and Wensum show positive correlations (Fig. 4).

There were few significant correlations between stream order and the RHS variables (Fig. 4). The only significant correlation after p-value correction is with 90th percentile HMS in the Wensum which shows a strong negative relationship.

Mean physical habitat diversity scores are higher in the Eden (mean=19) and Tamar (mean=20), than the Avon (mean=12) and Wensum (mean=11). When all catchments are combined mean, maximum and minimum physical habitat diversity show significant positive correlations with the distance network density topology metric (Fig. 4a). However, significant correlations were not consistent when analysis was split into individual catchments. The Eden and Tamar both show positive correlations across maximum, mean and minimum habitat diversity. This indicates that increases in network density cause an overall amplification of habitat diversity scores in each distance interval (however, positive correlations with mean diversity in the Tamar and minimum diversity in the Eden and Tamar were not significant). In contrast, the Avon and Wensum show positive correlations with maximum and mean habitat diversity but negative correlations with minimum diversity. In these cases, sites with the highest diversity become more heterogeneous in distance intervals with high network density, but the least diverse sites in each interval become more homogenous.

However, correlations with minimum physical habitat diversity are not significant in the Avon once the False Discovery Rate correction was applied and the Wensum has no significant correlations suggesting that network density has little influence on the catchment's physical habitat diversity.

Elevation network density shows no significant correlations with habitat diversity when all catchments were combined or in individual catchments (Fig. 4b). The elevation network density correlations show that maximum habitat diversity increases with network density in individual catchments, as with distance network density.

The range of physical habitat diversity is broad across the majority stream orders in all catchments (Fig. 4c). When all catchments are combined, physical habitat diversity score peaks in the mid reaches with 2<sup>nd</sup>, 3<sup>rd</sup> and 4<sup>th</sup> order streams being significantly different (Mann-Whitney U test  $p < 0.05$ ) from 5<sup>th</sup> and 6<sup>th</sup> order streams. In each individual catchment, the largest stream order has a significantly lower median habitat diversity than other stream orders. Aside from this, the relationship between physical habitat diversity scores and stream order varies between catchments. Peak median diversity occurs in 2<sup>nd</sup> order streams in the Avon, but in 3<sup>rd</sup> and 4<sup>th</sup> order streams in the Eden. Ranges of physical habitat diversity are relatively consistent in the Tamar and Wensum except for the significant decline in diversity in 6<sup>th</sup> order streams.

## 4 Discussion

### 4.1 A new approach to utilising network topology in catchment-level analysis

Network density metrics represent an alternative approach to account for network topology in catchment-level studies, optimising the width dimension of the network (or the number of links in the network) as opposed to the commonplace stream order metric which only reflects the longitudinal position of links in a network (Fig. 1). This study shows that two ~~new~~ topology metrics can be calculated simply from a DTM with GIS and, using a broad-scale analysis of river attributes, can be used to investigate the functional processes within catchments.

~~Elevation has been a key metric in explaining observations of RHS variables including flow type, substrate, etc. in a number of studies (Jeffers, 1998; Naura et al., 2016; Vaughan et al., 2013), so it is unsurprising that more streams, at a greater range of elevations, will introduce greater habitat diversity than intervals with more streams at the same elevation.~~

~~While the two network density metrics have similar forms (i.e. forms are consistently unimodal or multi-modal), the spatial configuration of the distance and elevation intervals used in the calculation of network density varies and may also impact the effectiveness of each topological metric. Distance network density separates the catchment into intervals based on distance which spread upstream radiate from the outlet (Fig. 23a), reflecting natural sub-basins within the fractal structure of the catchment (Lashermes and Fofoula-Georgiou, 2007). This differs from elevation network density which separates the catchment into intervals based on elevation, thus forming contours which radiate out from the main channel of each the catchment network (Fig. 23b). The configuration means that distance intervals contain streams that are in closer proximity to one another rather than the more distal configuration created by the elevation intervals, suggesting a degree of spatial dependency in river functioning. This has been highlighted in previous studies where spatial network structure has a stronger influence on some in-channel processes than predictor variables such as elevation (Steel et al., 2016). However, elevation intervals contain RHS sites that, although may be distal, may have similar properties as elevation has been strongly related to RHS variables including flow type, substrate, etc. in a number of studies (Jeffers, 1998; Naura et al., 2016; Vaughan et al., 2013).~~

~~Distance network density, which accounts for the width of the network along the distance dimension of the catchment, is the more successful metric with more significant and stronger correlations with physical habitat diversity than the elevation network density metric (Fig. 4a and b). This may be because each distance interval contains a broader range of elevations than elevation intervals within which elevation range is controlled.~~

### 4.2 Impacts of network topology on ~~instream physical habitats~~ river characteristics

~~River characteristics are assessed using the RHS dataset. The observations made by the RHS dataset (Table 1) cannot offer the level of detail regarding geomorphological process that river classifications that consider multiple scales can offer (e.g. Brierley and Fryirs, 2000; Gurnell et al., 2015). While process-based classifications are preferable, broad-scale monitoring datasets, such as the River Habitat Survey, may still be useful when combined with map-derived data to explore controls on river characteristics (Harvey et al., 2008; Naura et al., 2016; Vaughan et al., 2013). The use of the RHS data means addressing biases in data collection, an inherent limitation when using existing datasets (Vaughan and Ormerod, 2010), specifically the use of the~~

500m reach as the survey unit in the RHS. This standardised survey length will capture differing amounts of natural variability depending on the size of the river. While this must be noted, there are few significant correlations between river characteristics identified with stream order (Fig. 4) which suggests that channel size is not influencing the RHS variables to a great degree in these catchments.

In the case of the catchments investigated in this study, it is anticipated that sites in high network density areas will have higher levels of habitat diversity, as indicated by previous studies of confluences and networks (Benda et al., 2004a; Best, 1985; Rice, 2017), in turn increasing mean sediment size and flow type speed compared to sites in low density areas. The results of the correlations between distance network density and the river characteristics when all catchments are combined support this hypothesis, with greater HQA, flow speed type and coarser sediment sizes observed in areas with high distance network density (Fig. 4).

For individual catchments, elevation network density induces a stronger positive HQA response across all catchments than distance network density (Fig. 4). This supports the evidence that individual confluences (Rice et al., 2006) and high densities of confluences increase physical heterogeneity within the river network (Benda et al., 2004b; Rice, 2017). However, flow type speed and sediment size respond differently to network density in individual catchments.

Slower flow types are observed in high network density areas of the Avon and Tamar whereas faster flow types are observed in high elevation network density areas of the Wensum. Individual confluences are shown to create numerous high and low speed flow environments (Best, 1987) that may be observed in surface water topography (Biron et al., 2002). It was expected that the introduction of the additional flow types by a high density of confluences in relatively low-energy rivers would increase mean reach flow type speed, however, the correlation analysis (Fig. 4) suggests that in some catchments mean flow type speed is reduced.

Sediment sizes also show variation between catchments. Sediment size is coarser in high network density areas of the Avon and Eden as expected but is finer in both the Tamar and Wensum (Fig. 4). The evidence from high-energy rivers shows that sediment becomes coarser downstream and finer upstream of certain confluences (Benda et al., 2004a; Rice, 1998) and in this case was high numbers of confluences were expected to increase mean sediment size of the reach. However, the impact on sediment size is dependent on the sediment calibre of the incoming tributary being higher than the main-stem, with enough energy to transport the coarse sediment to the confluence for numerous tributaries in an area. The Tamar and Wensum have different ranges of sediment sizes, with the Tamar having on average coarser sediment than the Wensum (Fig. 3). This implies that tributaries may be energy limited whereas the Wensum may be coarse sediment limited. This has before been observed in a low-energy modified catchment where anthropogenic modifications in tributaries reduced coarse sediment and flow capacity causing either limited confluence impact or localised sediment fining (Singer, 2008).

Others have related the capacity of confluences to alter reach features to the morphometry of catchments, with larger and more circular catchments containing a higher percentage of confluences that have a significant impact (Rice, 2017). Based on this theory, the Eden and Tamar are likely to have the greatest impact as they are the most circular and steepest of the four catchments (although the Tamar is the smallest by area). Yet there is no clear pattern indicating that these catchments respond differently than the Avon and Wensum (Fig. 4), with

catchments responding differently to different variables. This perhaps suggests that rather than network density having a directional impact on factors such as flow type speed and sediment size, it has an impact on overall heterogeneity at the reach-level, as suggested by previous studies, and that specific directional change occur at the sub-reach level.

An increase in channel modification is also hypothesised due to the increase in flood peak downstream from confluences (Depettris et al., 2000) and the scour and erosion associated with confluence junctions (Best, 1986) potentially increasing the need for bed and bank protection. The correlations between distance network density and HMS when all catchments are combined undermine this hypothesis, showing less channel modification where distance network density is higher (Fig. 4). There were few significant correlations with individual catchments, but HMS in the Eden was consistently observed to be higher in areas of high elevation network density (Fig. 4). This may be due to the Eden's high elevation and steep topography inducing a higher energy environment where scour and erosion processes in areas with high numbers of confluences would be more likely to be present.

Differences in RHS variable responses also differed between the descriptive statistics considered. Often, the extremes, 90<sup>th</sup> percentile and 10<sup>th</sup> percentile, showed more significant and stronger correlations than the mean or median (Fig. 4). This may reflect findings from previous studies which suggest that not all confluences cause reach-scale changes (Rice, 1998), that perhaps the changes to river character induced by certain confluences only influence certain reaches, whereas others are left unaffected creating less pronounced responses in the mean and median of variables. External factors may also influence this trend, for example, 10<sup>th</sup> percentile HMS visually responded dramatically to network density metrics (Fig. 3a and 3b) compared to the other descriptive statistics. This suggests that the most natural sites (i.e. with the lowest HMS score) are responding differently to network density with the most natural sites having less modification in high network density areas whereas less natural sites become more modified in high network density areas. This reflects the HQA score results which visually (Fig. 3a and 3b) and statistically (Fig. 4) varies with distance network density, except for the 10<sup>th</sup> percentile. The sites with the lowest habitat quality and naturalness are likely influenced by anthropogenic factors that are independent of network density, reducing habitat quality scores at effected sites.

The two network density metrics have differing impacts on river characteristics. While distance network density shows consistently significant correlations when all catchments are combined, individual catchments respond more frequently and more strongly to elevation network density (Fig. 4). This may be because there is a dramatic split in distance network density values between the more upland, drainage dense catchments, Eden and Tamar, than the lowland, chalk, low drainage catchments, Avon and Wensum. The combined correlation will therefore in part reflect the difference between the catchments which have different ranges of river characteristics (Fig. 3). This is not the case for elevation network density which has higher density values in the Tamar and Wensum than the Avon and Eden, so therefore the characteristics of the catchments will have less bearing on the combined correlation. However, there are patterns identified with distance network density in individual catchments that are not present with elevation network density, increased flow type speed and sediment size in the Eden and reduced flow type speed in the Avon with network density (Fig. 4), that show its usefulness.



The results suggest that the distance network density and elevation network density metrics quantify different dimensions of network topology which are shown to exhibit functionally meaningful patterns for river reach characteristics based on the correlation results. Perhaps within catchments elevation network density provides the more powerful metric for individual catchments but distance network density better accounts for the drainage density of the catchments allowing it to be applied across multiple catchments.

Higher network density was expected to be related to higher levels of habitat diversity due to previous research stating that confluences in the network increase diversity and therefore catchments with higher drainage density will have higher morphological heterogeneity (Benda et al., 2004b). The results of the correlations between distance network density and physical habitat diversity score support this assumption (Fig. 4a). For example, when catchments are grouped together the results show that habitat diversity increases in network dense distance intervals, where there are more confluences.

The results from individual catchments give further insight into the degree of influence that distance network density has on habitat diversity (Fig. 4a). The maximum habitat diversity within distance intervals significantly increases with network density in all but one catchment, the Wensum. However, only the Eden shows a positive relationship between mean habitat diversity and network density, implying that in other catchments, greater network density only increases diversity at some sites but not enough to significantly impact mean diversity. This may reflect findings from previous studies which suggest that not all confluences cause reach scale changes (Rice, 1998) and that catchment shape influences the amount of significant confluences, with linear catchments containing approximately half as many significant confluences than compact catchments (Rice, 2017). The two catchments with the strongest correlations between distance network density and maximum habitat diversity, the Eden and Tamar, are the most compact catchments and the Wensum is the most linear suggesting that catchment shape may be influencing the effect of network density on habitat diversity. Further analysis on a greater range of catchment shapes is needed to fully support this conjecture.

There is evidence that in the Avon and Wensum, increasing network density reduces minimum habitat diversity, suggesting that network density both introduces increases heterogeneity and homogeneity within distance intervals. This may be because these catchments have a greater percentage of arable farmland than the other catchments so may experience greater inputs of fine sediments, reducing substrate size diversity. Other anthropogenic activities in response to concentrations of fine sediment, such as dredging may limit the amount of natural in-channel features and flow types. However, it must be noted that none of the negative correlations with minimum habitat diversity were significant once the False Discovery Rate correction had been applied.

The lack of significant results for the Wensum, and mean and minimum diversity in other catchments, suggest that low habitat diversity scores are frequently influenced by external factors such as anthropogenic modifications which are independent of network density. This suggests that the Network Dynamic Hypothesis theory that higher drainage density (a catchment scale metric of topology) equates to higher morphological heterogeneity (Benda et al., 2004b) is too simplistic. This is because network density varies spatially within catchments, creating spatial variation in habitat diversity scores, and also that external factors influence physical habitats in catchments.

#### 4.3 Comparison of stream order to ~~new topological~~ network density metrics

The classic method of accounting for network topology, stream order, is critiqued for failing to represent discontinuities in the network and simplifying the network into a gradient. The number of links in different stream orders is consistent across all catchments (~~Fig. 3e~~) not reflecting the internal structure of the network or the variety between catchments that is achieved by the distance network density and elevation network density metrics. The analysis of the two ~~new~~ network density metrics presented in this paper shows that distance from source and elevation are not mutually exclusive (Fig. 2a and 2b), contrary to the stream order metric which represents streams as upstream to downstream or upland to lowland.

~~Stream order does not sufficiently~~ has few significant correlations with many of the river characteristics considered in this study. Negative correlations with HMS in the Wensum were statistically significant post p-value correction likely driving the significant relationship with all catchments combined for this variable (Fig. 4). This suggests that modification is greater upstream in the Wensum, contrary to ideas that downstream reaches may show greater anthropogenic modification. Intense agricultural land use in the upper reaches of the Wensum is likely to be the cause of the high HMS scores upstream. The lack of significant correlations suggests that stream order and therefore an up-to-downstream gradient is not the predominant pattern in river characteristics despite the description of such a gradient by ~~represent the diversity introduced to the channel by the complexity of the network. In some cases, there was evidence of increased median diversity in mid reaches which is suggested by both~~ geomorphic (Schumm, 1977) and ecological frameworks (Vannote et al., 1980). This is surprising as distance and elevation which both reflect the up-to-downstream gradient have shown to be important factors in previous studies explaining patterns of RHS features at a national level (Jeffers, 1998; Vaughan et al., 2013). This implies that up-to-downstream gradient may not sufficiently reflect patterns of river characteristics through the river network within individual catchments. However, the ranges in physical habitat diversity scores were broad across all stream orders, with the most significant finding being that the highest order stream orders in catchments were generally the least diverse (Fig. 3e).

This study has found little reason to suggest that the purely longitudinal stream order metric is effective for explaining patterns of ~~habitat diversity~~ river characteristics in river networks. Others have also found that stream order has weak and inconsistent relationships with biodiversity patterns in river systems, arguing that the topological measure has no direct providing insufficient explanation of the mechanistic ~~controlling on~~ biodiversity (Vander Vorste et al., 2017). Instead, this study finds that the distance ~~network density metrics are~~ is a more powerful metric which conceptually provides an improved method of accounting for the impacts of network topology on the fluvial system exhibiting ~~strong~~ relationships with ~~habitat diversity, particularly maximum habitat diversity~~ river characteristics, particularly habitat quality score (Fig. 4a).

#### 4.4 Applicability of network topology metrics to different environments

Much of the seminal work on network and confluence impacts (e.g. the Network Dynamic Hypothesis; Benda et al., 2004b, and Link Discontinuity Concept; Rice et al., 2001) is conducted in natural, highly erosive catchments with first hand empirical measurements. However, in an age when rivers and their catchments are increasingly altered by anthropogenic modification (Meybeck, 2003), contemporary studies must not only aim to expand

590 knowledge but find methods of transferring knowledge to many, increasingly altered, catchments (Clifford, 2002).

The catchments selected by this study are more greatly modified and, although they reflect a range of fluvial environments in England, are more representative of lower energy catchments than the seminal studies. Benda et al. (2004a) suggests that confluence effects in less active landscapes would be subdued compared to highly erosive landscapes. The evidence presented here demonstrates the utility of evaluating network topological structure in studies on catchment-level effects in any type of fluvial environment because of the continuing relevance of network topology regardless of the low energy and increasingly widespread anthropogenic changes in catchments. The response of some river characteristics varied between catchments; observations of flow type speed, sediment size and modifications showed different responses to network density in different catchments. The impact did not vary with catchment topography or circularity as has been shown in prior studies (Benda et al., 2004a; Rice, 2017). This suggests that the functional effect of these topological metrics is catchment dependent and likely is influenced by external catchment characteristics such as land use not considered in this study. This should be explored further in future research to enable recommendations to be made regarding where and how reaches may respond to network density. The response of habitat quality score was, however, consistent across catchments and between metrics showing that habitat quality is greater in areas with high network density (Fig. 4) as hypothesised by the Network Dynamic Hypothesis (Benda et al., 2004b) and demonstrated by studies on individual catchments (Rice, 2017; Rice et al., 2006). However, it must be noted that the catchment with the lowest elevation range, the Wensum, showed no significant results with distance network density or elevation network density (Fig. 4a and b). This suggests that these topological metrics may only have a functional effect on in-channel diversity with sufficient energy, a topic which should be explored further in future research.

The methods presented in this paper are designed to be implemented in any catchment with a dendritic network structure. The topology metrics can easily be calculated from any dendritic network with DTM data using GIS and compared to any site scale data. This study uses regulatory monitoring datasets so that analysis is targeted to in-channel assessment scores and physical features of interest to river managers. Also, the high volume and wide spatial extent of data available from regulatory sources allows for between catchment comparisons. The influence of network topology on in-channel functioning is likely to vary between catchments depending on the modification and energy of the fluvial system.

## 5 Conclusions

620 Although appreciation of catchment-level effects is considered the epitome of understanding river functioning, the key component of the catchment - the river network - is overlooked and oversimplified by catchment-level studies. This study finds that river network topology plays a role in structuring the distribution physical habitat diversity river characteristics throughout the catchment, offering more detailed explanation than the classic stream order metric. Network dense areas are generally found to have greater habitat diversity higher habitat quality and diversity and in-but modification, flow type speed and sediment size show different responses in different catchments. some cases where agricultural land use is more dominant, a potentially negative impact on habitat diversity. This study suggests two potential reasons for this: (1) there is evidence that confluences in the

river network increase diversity, as is observed in this study, so the direction of mean river characteristic response may not be consistent and (2) there may be external factors such as sediment availability, land cover and The study also highlights that anthropogenic modification that alter the direction of mean river characteristic response, and other factors mean that network density only has an impact at some sites in the catchment. This paper shows demonstrates that the functional response of river characteristics to network topology and suggests itself may be in part influenced by catchment characteristics, demonstrating that the inclusion of network topology in catchment-level studies would adds a layer of function-based understanding to such studies, linking reaches to their catchments.

The broad-scale methodology adopted by this study allows the ~~most successful~~ network density topology metrics, ~~distance network density~~ (which are easily extracted from open-source data using GIS software), to be compared to any regulatory dataset. The use of regulatory datasets not only allows for analysis over a wider spatial extent but also for more applicable results for regulatory bodies. Therefore, the interdisciplinary approach to characterising network topology can be applied efficiently and effectively to capture catchment-level impacts on ~~in-channel~~ reach-level functioning in any catchment across the globe.

## Appendix A

**Table A1.** Significant correlations ( $p < 0.05^*$ ) between physical habitat diversity scores and (a) Distance network density and (b) Elevation network density for all catchments combined and each catchment. Table also shows p-values with the False Discovery Rate (FDR) correction to account for the number of correlations conducted.

(a)

|                | All catchments |             | Avon    |             | Eden    |             | Tamar   |             | Wensum  |             |
|----------------|----------------|-------------|---------|-------------|---------|-------------|---------|-------------|---------|-------------|
|                | p-value        | FDR p-value | p-value | FDR p-value | p-value | FDR p-value | p-value | FDR p-value | p-value | FDR p-value |
| Mean diversity | <0.01*         | <0.01*      | 0.39    | 0.45        | <0.01*  | <0.01*      | 0.17    | 0.25        | 0.21    | 0.26        |
| Max diversity  | <0.01*         | <0.01*      | 0.01*   | 0.02*       | 0.01*   | 0.02*       | 0.01*   | 0.02*       | 0.74    | 0.74        |
| Min diversity  | <0.01*         | 0.01*       | 0.03*   | 0.06        | 0.56    | 0.60        | 0.19    | 0.26        | 0.10    | 0.17        |

(b)

|                | All catchments |             | Avon    |             | Eden    |             | Tamar   |             | Wensum  |             |
|----------------|----------------|-------------|---------|-------------|---------|-------------|---------|-------------|---------|-------------|
|                | p-value        | FDR p-value | p-value | FDR p-value | p-value | FDR p-value | p-value | FDR p-value | p-value | FDR p-value |
| Mean diversity | 0.15           | 0.38        | 0.08    | 0.30        | 0.10    | 0.30        | 0.38    | 0.52        | 0.30    | 0.50        |
| Max diversity  | 0.70           | 0.75        | 0.26    | 0.50        | 0.33    | 0.50        | 0.02*   | 0.23        | 0.27    | 0.50        |
| Min diversity  | 0.65           | 0.75        | 0.06    | 0.30        | 0.03*   | 0.23        | 0.44    | 0.55        | 0.99    | 0.99        |

**Table A2.** Significant differences ( $p < 0.05^*$ ) in physical habitat diversity scores between stream orders for all catchments combined and each catchment using pairwise Mann-Whitney U tests with False Discovery Rate (FDR) correction. (n/a – the Avon has no 6<sup>th</sup> order streams).

|                 |                         | All catchments | Avon        | Eden        | Tamar       | Wensum      |
|-----------------|-------------------------|----------------|-------------|-------------|-------------|-------------|
|                 |                         | FDR p-value    | FDR p-value | FDR p-value | FDR p-value | FDR p-value |
| 1 <sup>st</sup> | - 2 <sup>nd</sup> order | 0.04*          | <0.01*      | 0.76        | 0.99        | 0.48        |
| 1 <sup>st</sup> | - 3 <sup>rd</sup> order | <0.01*         | 0.71        | 0.01*       | 0.91        | 0.06        |
| 1 <sup>st</sup> | - 4 <sup>th</sup> order | 0.16           | 0.81        | 0.02*       | 0.49        | 0.72        |
| 1 <sup>st</sup> | - 5 <sup>th</sup> order | 0.06           | 0.02*       | 0.99        | 0.99        | 0.53        |
| 1 <sup>st</sup> | - 6 <sup>th</sup> order | 0.11           | n/a         | <0.01*      | 0.05        | <0.01*      |
| 2 <sup>nd</sup> | - 3 <sup>rd</sup> order | 0.11           | <0.01*      | <0.01*      | 0.91        | 0.29        |
| 2 <sup>nd</sup> | - 4 <sup>th</sup> order | 0.61           | <0.01*      | 0.01*       | 0.49        | 0.27        |
| 2 <sup>nd</sup> | - 5 <sup>th</sup> order | <0.01*         | <0.01*      | 0.78        | 0.99        | 0.82        |
| 2 <sup>nd</sup> | - 6 <sup>th</sup> order | <0.01*         | n/a         | <0.01*      | 0.07        | <0.01*      |
| 3 <sup>rd</sup> | - 4 <sup>th</sup> order | 0.08           | 0.71        | 0.84        | 0.49        | 0.02*       |
| 3 <sup>rd</sup> | - 5 <sup>th</sup> order | <0.01*         | 0.01*       | 0.02*       | 0.86        | 0.08        |
| 3 <sup>rd</sup> | - 6 <sup>th</sup> order | <0.01*         | n/a         | <0.01*      | 0.02*       | <0.01*      |
| 4 <sup>th</sup> | - 5 <sup>th</sup> order | <0.01*         | 0.01*       | 0.02*       | 0.46        | 0.16        |
| 4 <sup>th</sup> | - 6 <sup>th</sup> order | 0.02*          | n/a         | <0.01*      | 0.02*       | <0.01*      |
| 5 <sup>th</sup> | - 6 <sup>th</sup> order | 0.69           | n/a         | <0.01*      | 0.07        | <0.01*      |

655 **Competing interests.** The authors declare that they have no conflict of interest.

### Acknowledgements

The authors would like to thank the Environment Agency and the Centre for Ecology and Hydrology for access to the data used in this paper. The data used are listed in the references. This research is funded by the Natural Environmental Research Council (NERC).

660

### References

Belletti, B., Rinaldi, M., Buijse, A. D., Gurnell, A. M. and Mosselman, E.: A review of assessment methods for river hydromorphology, *Environ. Earth Sci.*, 73, 2079–2100, doi:10.1007/s12665-014-3558-1, 2015.

665 Benda, L., Andras, K., Miller, D. and Bigelow, P.: Confluence effects in rivers: Interactions of basin scale, network geometry, and disturbance regimes, *Water Resour. Res.*, 40(5), 1–15, doi:10.1029/2003WR002583, 2004a.

Benda, L., Poff, N. L., Miller, D., Dunne, T., Reeves, G., Pess, G. and Pollock, M.: The network dynamics hypothesis: how channel networks structure riverine habitats, *Bioscience*, 54(5), 413–427, doi:10.1641/0006-3568(2004)054[0413:TNDHHC]2.0.CO;2, 2004b.

- 670 Benjamini, Y. and Hochberg, Y.: Controlling the False Discovery Rate : A Practical and Powerful Approach to Multiple Testing, *J. R. Stat. Soc. Ser. B ( Methodol. )*, 57(1), 289–300, 1995.
- Best, J. L.: Flow dynamics and sediment transport at river channel confluences, Birbeck. University of London., 1985.
- Best, J. L.: The morphology of river channel confluences, *Prog. Phys. Geogr.*, 10, 157–174, doi:10.1177/030913338601000201, 1986.
- 675 Best, J. L.: Flow Dynamics At River Channel Confluences: Implications for Sediment Transport and Bed Morphology, *Recent Dev. Fluv. Sedimentol.*, 27–35, doi:10.2110/pec.87.39.0027, 1987.
- Biron, P. M., Richer, A., Kirkbride, A. D., Roy, A. G. and Han, S.: Spatial patterns of water surface topography at a river confluence, *Earth Surf. Process. Landforms*, 27(9), 913–928, doi:10.1002/esp.359, 2002.
- 680 Bravard, J. P. and Gilvear, D. J.: Hydrological and geomorphological structure of hydrosystems, in *The Fluvial Hydrosystem*, edited by G. E. Petts and C. Amoros, pp. 98–116, Springer Netherlands., 1996.
- Brierley, G. and Fryirs, K.: River Styles, a Geomorphic Approach to Catchment Characterization: Implications for River Rehabilitation in Bega Catchment, New South Wales, Australia., *Environ. Manage.*, 25(6), 661–679, 2000.
- 685 Bunn, S. E. and Arthington, A. H.: Basic principles and ecological consequences of altered flow regimes for aquatic biodiversity, *Environ. Manage.*, 30(4), 492–507, doi:10.1007/s00267-002-2737-0, 2002.
- Church, M. and Kellerhals, R.: On the statistics of grain size variation along a gravel river, *Can. J. Earth Sci.*, 15(7), 1151–1160, 1978.
- Clifford, N. J.: Hydrology : the changing paradigm, *Prog. Phys. Geogr.*, 26(2), 290–301, 2002.
- 690 Cohen, P., Andriamahefa, H. and Wasson, J.-G.: Towards a regionalization of aquatic habitat: distribution of mesohabitats at the scale of a large basin., *Regul. Rivers Res. Manag.*, 14(1), 391–404, doi:10.1002/(SICI)1099-1646(199809/10)14:5<391::AID-RRR513>3.0.CO;2-W, 1998.
- Davenport, A. J., Gurnell, A. M. and Armitage, P. D.: Habitat survey and classification of urban rivers, *River Res. Appl.*, 20(6), 687–704, doi:10.1002/rra.785, 2004.
- 695 Davies, N. M., Norris, R. H. and Thoms, M. C.: Prediction and assessment of local stream habitat features using large-scale catchment characteristics, *Freshw. Biol.*, 45, 343–369, 2000.
- Depettris, C., Mendiando, E. M., Neiff, J. and Rohrmann, H.: Flood defence strategy at the confluence of the Paraná-Paraguay rivers, *Proc. Int. Symp. Flood Def.*, Kassel: He, C31,C40, 2000.
- Dollar, E., James, C., Rogers, K. and Thoms, M.: A framework for interdisciplinary understanding of rivers as ecosystems, *Geomorphology*, 89(1–2), 147–162, 2007.
- 700 Dovers, S. R. and Day, D. G.: Australian rivers and statute law, *Environ. Plan. Law J.*, 5, 90–108, 1988.
- Downs, P. W., Gregory, K. J. and Brookes, A.: How integrated is river basin management?, *Environ. Manage.*,



15(3), 299–309, doi:10.1007/BF02393876, 1991.

Emery, J. C., Gurnell, A. M., Clifford, N. J. and Petts, G. E.: Characteristics and controls of gravel-bed riffles:  
705 An analysis of data from the river-habitat survey, *Water Environ. J.*, 18(4), 210–216, doi:10.1111/j.1747-  
6593.2004.tb00535.x, 2004.

Evans, I. S. and Minár, J.: A classification of geomorphometric variables, in *International Geomorphometry*  
2011, pp. 105–108, Geomorphometry.org, Redlands, CA., 2011.

Fausch, K. D., Torgersen, C. E., Baxter, C. V., Li, H. W., View, C., The, O. F., Is, R., To, N., How, U., Among,  
710 I., Set, S., For, C. and Fishes, S.: Landscapes to riverscapes: Bridging the gap between research and  
conservation of stream fishes, *Bioscience*, 52(6), 483–498, doi:10.1641/0006-  
3568(2002)052[0483:LTRBTG]2.0.CO;2, 2002.

Glickman, M. E., Rao, S. R. and Schultz, M. R.: False discovery rate control is a recommended alternative to  
Bonferroni-type adjustments in health studies, *J. Clin. Epidemiol.*, 67(8), 850–857,  
715 doi:http://dx.doi.org/10.1016/j.jclinepi.2014.03.012, 2014.

Gupta, V. K. and Mesa, O. J.: Runoff generation and hydrologic response via channel network geomorphology -  
Recent progress and open problems, *J. Hydrol.*, 102(1–4), 3–28, doi:10.1016/0022-1694(88)90089-3, 1988.

Gupta, V. K. and Waymire, E. D.: On the formulation of an analytical approach to hydrologic response and  
similarity at the basin scale, *J. Hydrol.*, 65(1–3), 95–123, 1983.

720 Gupta, V. K., Waymire, E. D. and Rodriguez-Iturbe, I.: On scales, gravity and network structure in basin runoff,  
in *Scale problems in hydrology*, pp. 159–184, Springer Netherlands., 1986.

Gurnell, A. M., Rinaldi, M., Belletti, B., Bizzi, S., Blamauer, B., Braca, G., Buijse, A. D., Bussetini, M.,  
Camenen, B., Comiti, F., Demarchi, L., Garc??a de Jal??n, D., Gonz??lez del T??nago, M., Grabowski, R. C.,  
Gunn, I. D. M., Habersack, H., Hendriks, D., Henshaw, A. J., Kl??sch, M., Lastoria, B., Latapie, A.,  
725 Marcinkowski, P., Mart??nez-Fern??ndez, V., Mosselman, E., Mountford, J. O., Nardi, L., Okruszko, T.,  
O??Hare, M. T., Palma, M., Percopo, C., Surian, N., van de Bund, W., Weissteiner, C. and Ziliani, L.: A multi-  
scale hierarchical framework for developing understanding of river behaviour to support river management,  
*Aquat. Sci.*, 78(1), 1–16, doi:10.1007/s00027-015-0424-5, 2015.

Harvey, G. L., Gurnell, A. M. and Clifford, N. J.: Characterisation of river reaches: The influence of rock type,  
730 *Catena*, 76(1), 78–88, doi:10.1016/j.catena.2008.09.010, 2008.

Helsel, B. D. R. and Hirsch, R. M.: Chapter A3. Statistical Methods in Water Resources, B. 4, *Hydrol. Anal.*  
*Interpret. Tech. Water-Resources Investig. United States Geol. Surv.*, 2002.

Ver Hoef, J. M. and Peterson, E. E.: A Moving Average Approach for Spatial Statistical Models of Stream  
Networks, *J. Am. Stat. Assoc.*, 105(489), 6–18, doi:10.1198/jasa.2009.ap08248, 2010.

735 Hornby, D. D.: RivEX. 6.7 ed., <http://www.rivex.co.uk>, 2010.

Jeffers, J. N. R.: Characterization of river habitats and prediction of habitat features using ordination techniques,

Aquat. Conserv. Mar. Freshw. Ecosyst., 8(4), 529–540, 1998.

Jones, N. E. and Schmidt, B. J.: Tributary effects in rivers: interactions of spatial scale, network structure, and landscape characteristics, *Can. J. Fish. Aquat. Sci.*, 1–8, 2016.

740 Jusik, S., Szoszkiewicz, K., Kupiec, J. M., Lewin, I. and Samecka-Cymerman, A.: Development of comprehensive river typology based on macrophytes in the mountain-lowland gradient of different Central European ecoregions, *Hydrobiologia*, 745(1), 241–262, doi:10.1007/s10750-014-2111-2, 2015.

Kiffney, P. M., Greene, C. M., Hall, J. E. and Davies, J. R.: Tributary streams create spatial discontinuities in habitat, biological productivity, and diversity in mainstem rivers, *Can. J. Fish. Aquat. Sci.*, 63, 2518–2530, 745 doi:10.1139/f06-138, 2006.

Kirkby, M.: Tests of the random network model, and its application to basin hydrology, *Earth Surf. Process.*, 1, 197–212, doi:10.1002/esp.3290010302, 1976.

Knighton, A. D.: Longitudinal changes in size and sorting of stream-bed material in four English rivers, *Geol. Soc. Am. Bull.*, 91(1), 55–62, doi:10.1130/0016-7606(1980)91<55:LCISAS>2.0.CO;2, 1980.

750 Lashermes, B. and Foufoula-Georgiou, E.: Area and width functions of river networks: New results on multifractal properties, *Water Resour. Res.*, 43(9), 1–19, doi:10.1029/2006WR005329, 2007.

Macklin, M. G. and Lewin, J.: River sediments, great floods and centennial-scale Holocene climate change, *J. Quat. Sci.*, 18(2), 101–105, doi:10.1002/jqs.751, 2003.

McGonigle, D. F., Burke, S. P., Collins, a L., Gartner, R., Haft, M. R., Harris, R. C., Haygarth, P. M., Hedges, 755 M. C., Hiscock, K. M. and Lovett, a a: Developing Demonstration Test Catchments as a platform for transdisciplinary land management research in England and Wales., *Environ. Sci. Process. Impacts*, 1618–1628, doi:10.1039/c3em00658a, 2014.

Meybeck, M.: Global analysis of river systems: from Earth system controls to Anthropocene syndromes., *Philos. Trans. R. Soc. Lond. B. Biol. Sci.*, 358(1440), 1935–55, doi:10.1098/rstb.2003.1379, 2003.

760 Milesi, S. V. and Melo, A. S.: Conditional effects of aquatic insects of small tributaries on mainstream assemblages : position within drainage network matters, *Can. J. Fish. Aquat. Sci.*, 71(1), 1–9, 2013.

Moore, R. V., Morris, D. G. and Flavin, R. W.: Sub-set of UK digital 1:50,000 scale river centreline network., NERC, Inst. Hydrol. Wallingford., 1994.

Morris, D. G. and Flavin, R. W.: Sub-set of UK 50m by 50m hydrological digital terrain model grids., NERC, 765 Inst. Hydrol. Wallingford., 1994.

Naura, M., Clark, M. J., Sear, D. A., Atkinson, P. M., Hornby, D. D., Kemp, P., England, J., Peirson, G., Bromley, C. and Carter, M. G.: Mapping habitat indices across river networks using spatial statistical modelling of River Habitat Survey data, *Ecol. Indic.*, 66, 20–29, doi:10.1016/j.ecolind.2016.01.019, 2016.

Newson, M.: Understanding “hot-spot” problems in catchments: The need for scale-sensitive measures and 770 mechanisms to secure effective solutions for river management and conservation, *Aquat. Conserv. Mar. Freshw.*

Ecosyst., 20(1), 62–72, doi:10.1002/aqc.1091, 2010.

Newson, M. D.: Land, water and development: sustainable and adaptive management of rivers, Third ed., Routledge., 2008.

775 Osborne, L. L. and Wiley, M. J.: Influence of tributary spatial position on the structure of warmwater fish communities, Can. J. Fish. Aquat. Sci., 49(4), 671–681, doi:10.1139/f92-076, 1992.

Owens, P. N., Batalla, R. J., Collins, A. J., Gomez, B., Hicks, D. M., Horowitz, A. J., Kondolf, G. M., Marden, M., Page, M. J., Peacock, D. H., Petticrew, E. L., Salomons, W. and Trustrum, N. A.: Fine-grained sediment in river systems: environmental significance and management issues, River Res. Appl., 21(7), 693–717, doi:10.1002/rra.878, 2005.

780 Perry, J. A. and Schaeffer, D. J.: The longitudinal distribution of riverine benthos: a river discontinuum?, Hydrobiologia, 148(3), 257–268, 1987.

Peterson, E. E., Ver Hoef, J. M., Isaak, D. J., Falke, J. A., Fortin, M. J., Jordan, C. E., McNyset, K., Monestiez, P., Ruesch, A. S., Sengupta, A., Som, N., Steel, E. A., Theobald, D. M., Torgersen, C. E. and Wenger, S. J.: Modelling dendritic ecological networks in space: An integrated network perspective, Ecol. Lett., 16(5), 707–  
785 719, doi:10.1111/ele.12084, 2013.

Petts, G. E. and Amoros, C.: The Fluvial Hydrosystems, Springer, Dordrecht., 1996.

Raven, P., Fox, P., Everard, M., Holmes, N. T. H. and Dawson, F. H.: River Habitat Survey: a new system for classifying rivers according to their habitat quality, in Boon, P.J., Howell, D.L. (eds.), Freshwater Quality: Defining the Indefinable? The Stationery Office, Edinburgh., pp. 215–234., 1996.

790 Raven, P. J., Holmes, N. T. H., Dawson, F. H. and Everard, M.: Quality assessment using River Habitat Survey data, Aquat. Conserv. Mar. Freshw. Ecosyst., 8(4), 477–499, doi:10.1002/(SICI)1099-0755(199807/08)8:4<477::AID-AQC299>3.0.CO;2-K, 1998.

Rice, S.: Which tributaries disrupt downstream fining along gravel-bed rivers?, Geomorphology, 22(1), 39–56, doi:10.1016/S0169-555X(97)00052-4, 1998.

795 Rice, S. P.: Tributary connectivity, confluence aggradation and network biodiversity, Geomorphology, 277, 6–16, doi:10.1016/j.geomorph.2016.03.027, 2017.

Rice, S. P., Greenwood, M. T. and Joyce, C. B.: Tributaries, sediment sources, and the longitudinal organisation of macroinvertebrate fauna along river systems, Can. J. Fish. Aquat. Sci., 58(4), 824–840, doi:10.1139/cjfas-58-4-824, 2001.

800 Rice, S. P., Ferguson, R. I. and Hoey, T. B.: Tributary control of physical heterogeneity and biological diversity at river confluences, Can. J. Fish. Aquat. Sci., 63(11), 2553–2566, doi:10.1139/f06-145, 2006.

Richards, C., Johnson, L. B. and Host, G. E.: Landscape-scale influences on stream habitats and biota, Can. J. Fish. Aquat. Sci., 53(S1), 295–311, doi:10.1139/f96-006, 1996.

Richards, C., Haro, R., Johnson, L. and Host, G.: Catchment and reach-scale properties as indicators of

- 805 macroinvertebrate species traits, *Freshw. Biol.*, 37(1), 219–230, doi:10.1046/j.1365-2427.1997.d01-540.x, 1997.
- Rodriguez-Iturbe, I. and Valdes, J. B.: The Geomorphologic Structure of Hydrologic Response, *Water Resour. Res.*, 15(6), 1409–1420, 1979.
- Rowntree, K.: The hydraulics of physical biotopes-terminology, inventory and calibration, WRC Rep. KV84/96, SBN, 1996.
- 810 Schindfessel, L., Creëlle, S. and De Mulder, T.: Flow Patterns in an Open Channel Confluence with Increasingly Dominant Tributary Inflow, *Water*, 7, 4724–4751, doi:10.3390/w7094724, 2015.
- Schumm, S. A.: *The Fluvial System*, John Wiley & Sons, New York., 1977.
- Singer, M. B.: Downstream patterns of bed material grain size in a large , lowland alluvial river subject to low sediment supply, *Water Resour. Res.*, 44, 1–7, doi:10.1029/2008WR007183, 2008.
- 815 Steel, E. A., Sowder, C. and Peterson, E. E.: Spatial and Temporal Variation of Water Temperature Regimes on the Snoqualmie River Network, *JAWRA J. Am. Water Resour. Assoc.*, 52(3), 769–787, doi:10.1111/1752-1688.12423, 2016.
- Stepinski, T. F. and Stepinski, A. P.: Morphology of drainage basins as an indicator of climate on early Mars, *J. Geophys. Res. E Planets*, 110(12), 1–10, doi:10.1029/2005JE002448, 2005.
- 820 Strahler, A.: Quantitative analysis of watershed geomorphology, *Trans. Am. Geophys. Union*, 38(6), 913–920, 1957.
- Vannote, R., Minshall, G., Cummins, K., Sedell, J. and Cushing, C.: The River Continuum Concept, *Can. J. Fish. Aquat. Sci.*, 37(1), 130–137, 1980.
- Vaughan, I. P. and Ormerod, S. J.: Linking ecological and hydromorphological data: Approaches, challenges  
825 and future prospects for riverine science, *Aquat. Conserv. Mar. Freshw. Ecosyst.*, 20(1), 125–130, 2010.
- Vaughan, I. P., Merrixx-Jones, F. L. and Constantine, J. A.: Successful predictions of river characteristics across England and Wales based on ordination, *Geomorphology*, 194, 121–131, 2013.
- Vander Vorste, R., McElmurray, P., Bell, S., Eliason, K. M. and Brown, B. L.: Does stream size really explain biodiversity patterns in lotic systems? A call for mechanistic explanations, *Diversity*, 9(3), 1–21,  
830 doi:10.3390/d9030026, 2017.

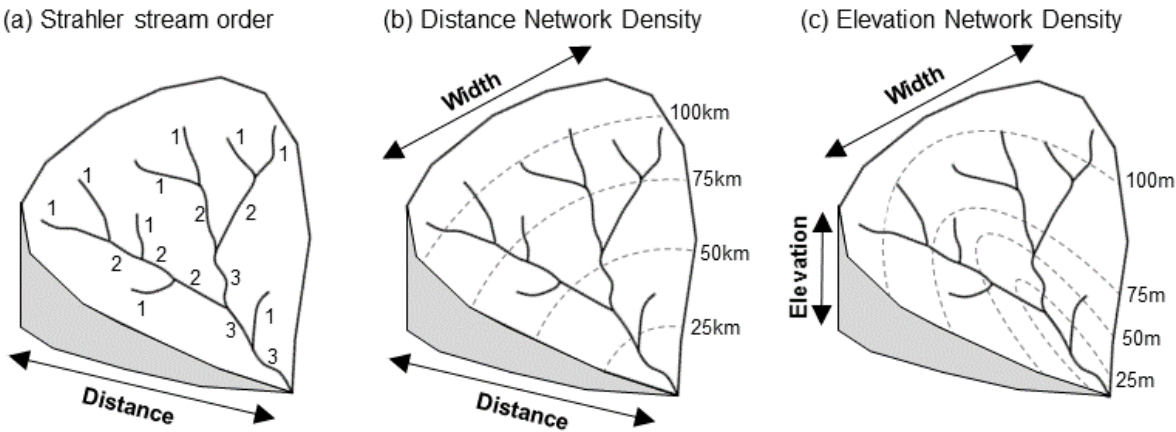

**Figure 1.** Topological metrics explored in this paper and the dimensions of the network they represent. (a) Strahler stream ordering representing only the distance dimension of the network. (b) Distance network density representing the width dimension of the network at each distance interval (inspired by the network width function; Kirkby, 1976). (c) Elevation network density representing the width dimension of the network at each elevation interval (inspired by the link concentration function; Gupta et al., 1986).

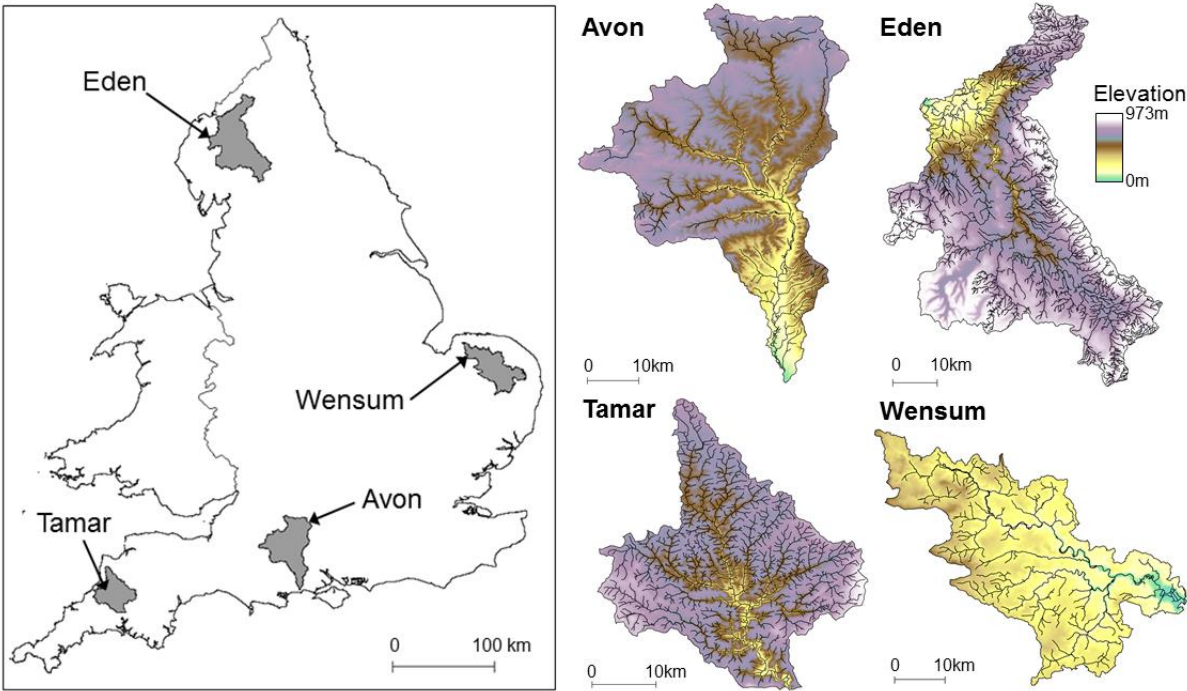

850 **Figure 2.** Demonstration Test Catchments. On the left, a map of catchment locations in England. On the right, topographic maps of each catchment with the river network shown in black.

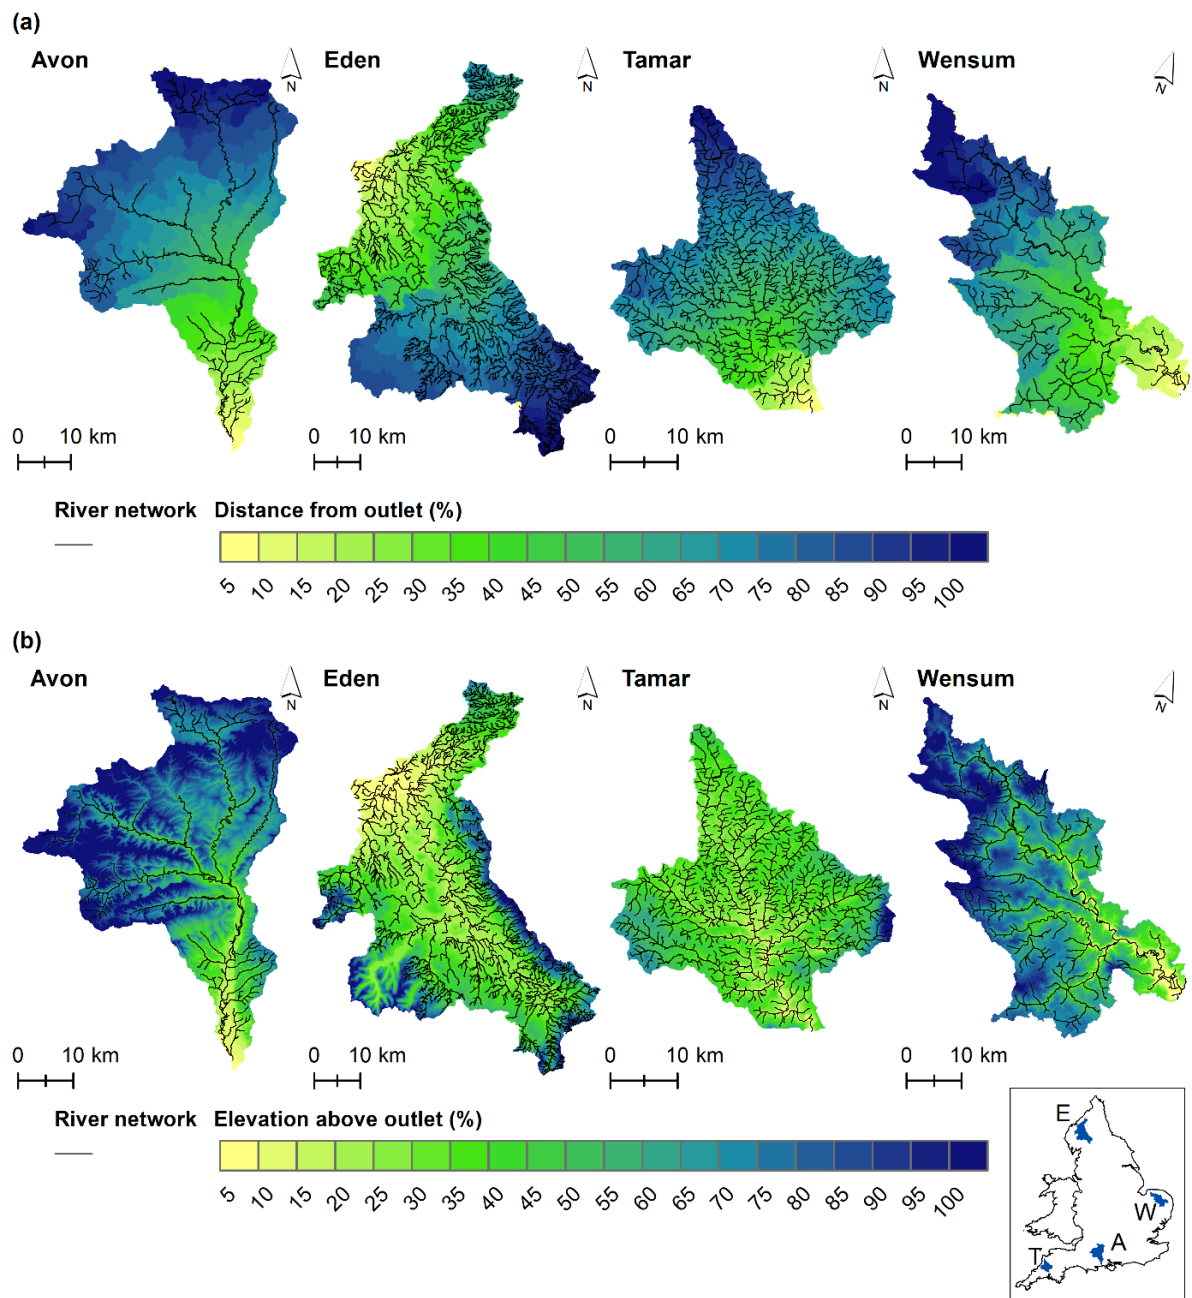

855 **Figure 2.** Distance and elevation intervals for each Demonstration Test Catchment; Avon (A), Eden (E), Tamar (T) and Wensum (W). (a) Percentage distance intervals used to calculate distance network density. (b) Percentage elevation intervals used to calculate elevation network density. Map of catchment locations in England in bottom-right corner.



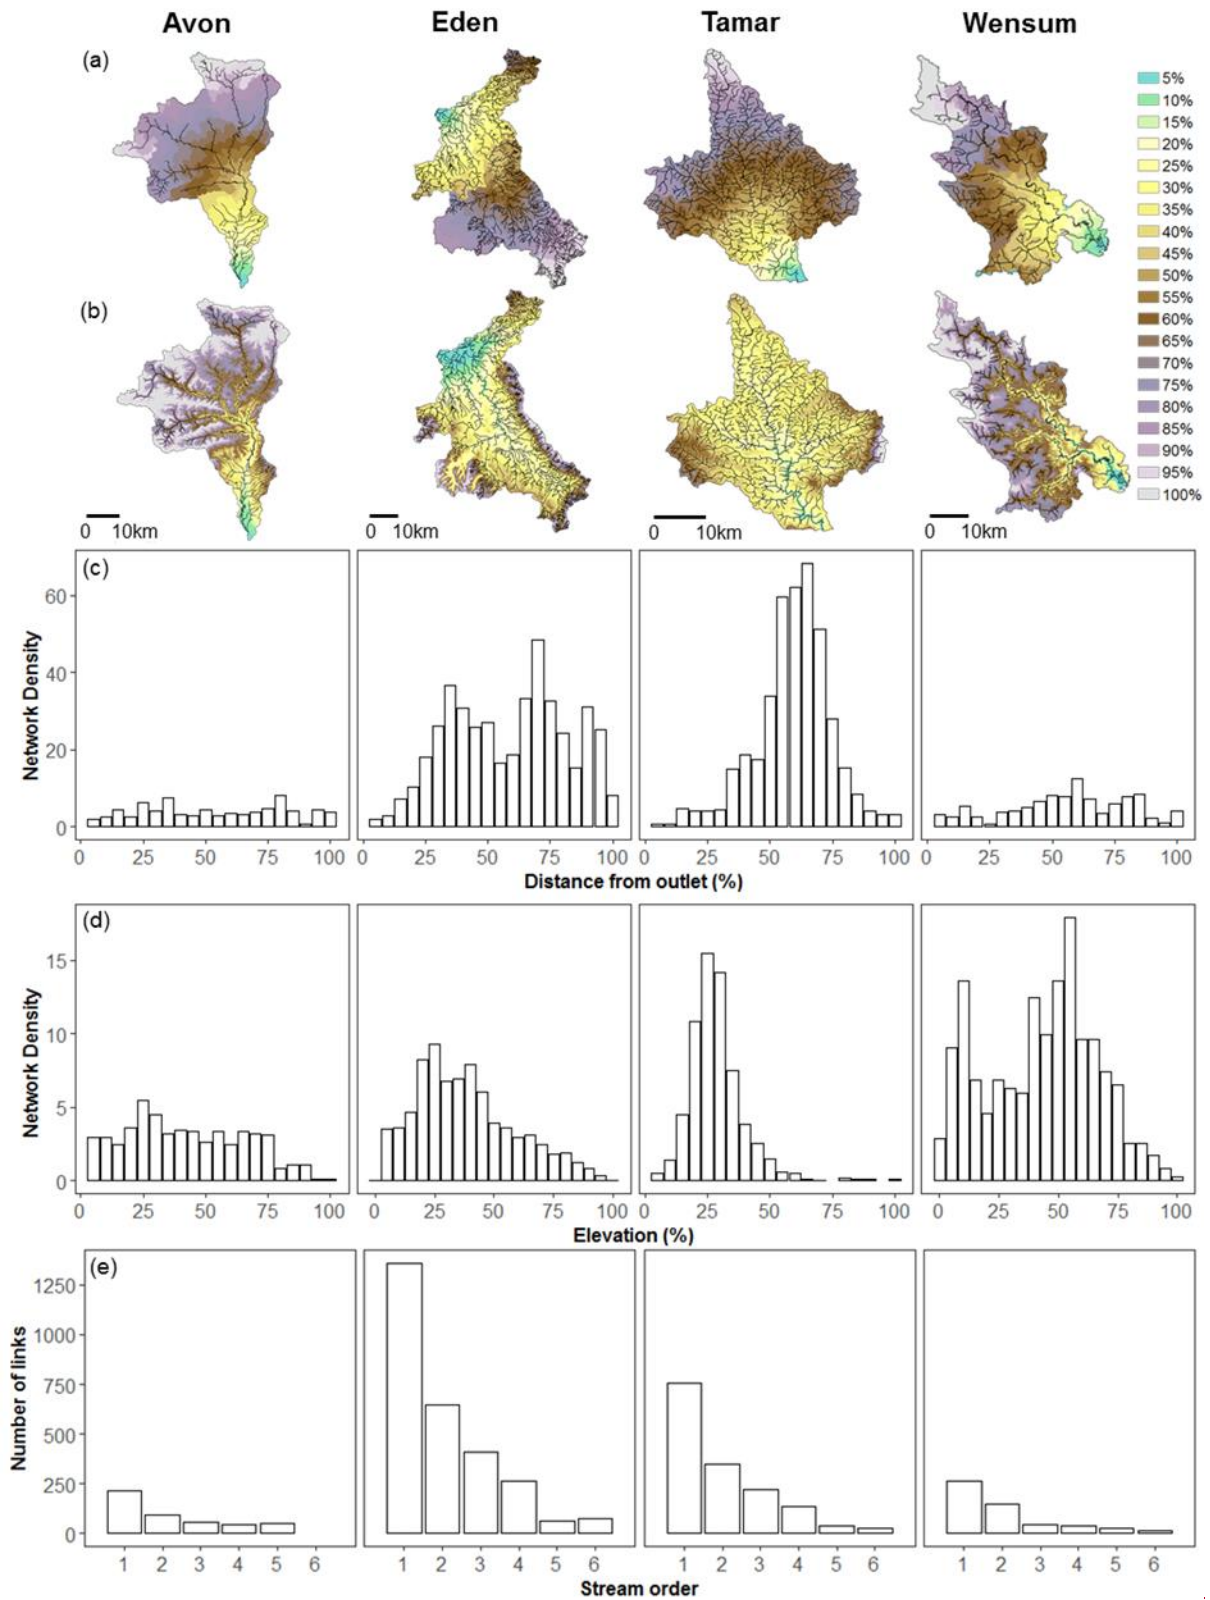

Figure 3. Network topology metrics for each catchment. (a) Percentage distance from the outlet intervals used to calculate distance network density. (b) Percentage elevation intervals used to calculate elevation network density. (c) Distance network density metric. (d) Elevation network density metric. (e) Number of links classified as each Strahler stream order.

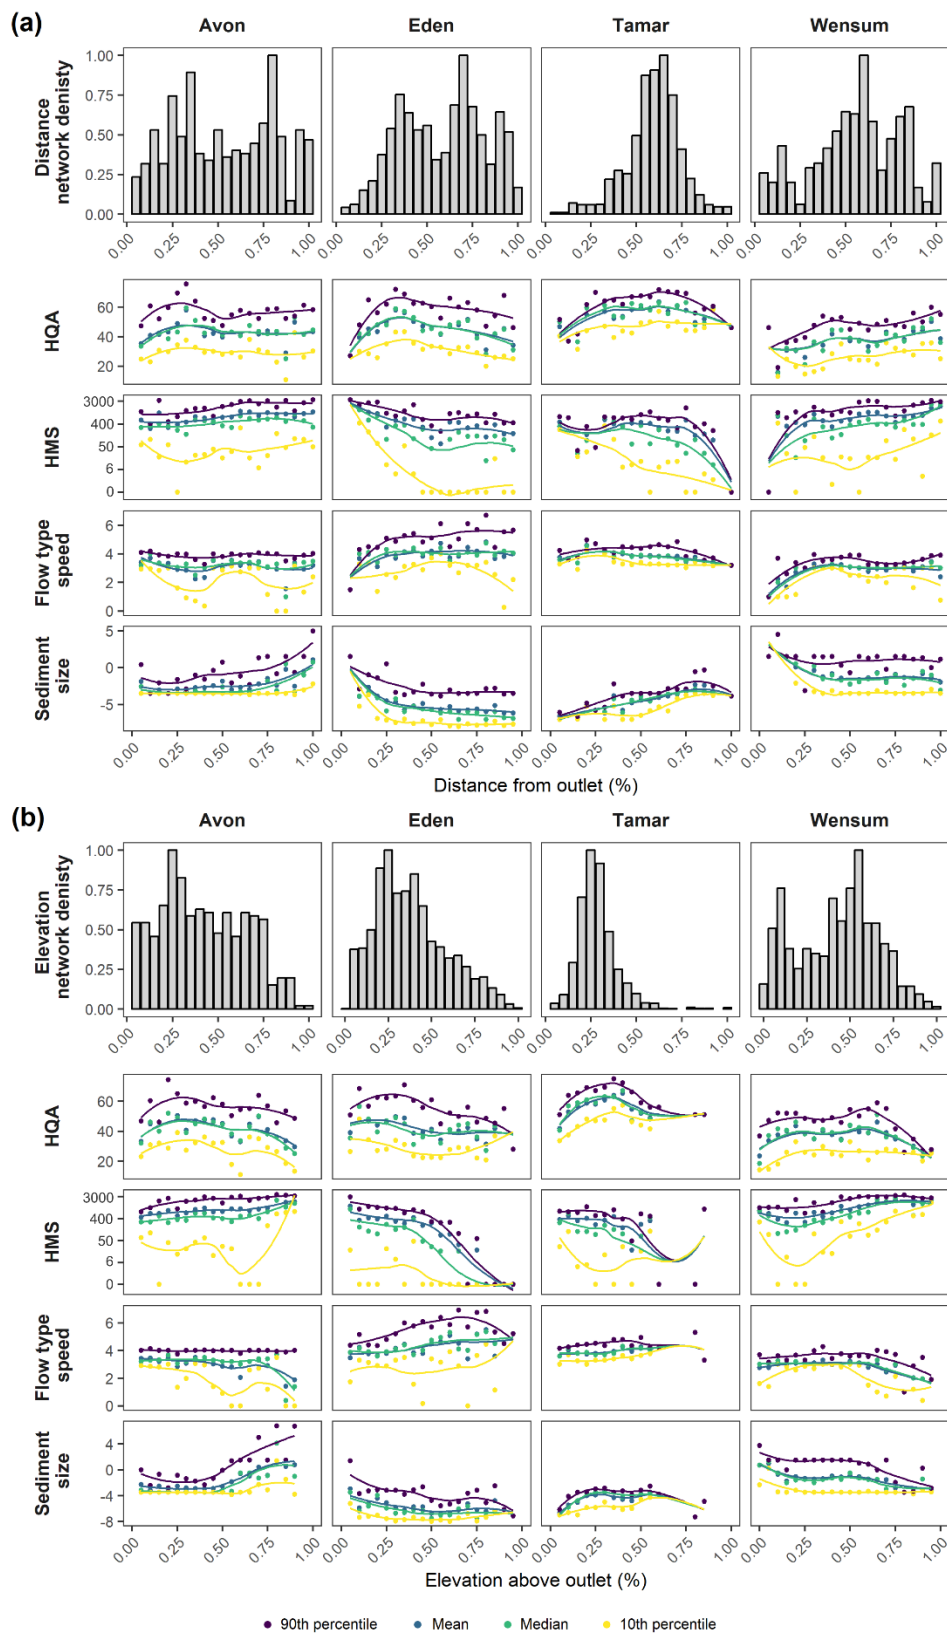

**Figure 3.** Network topology metrics (a) distance network density and (b) elevation network density. Descriptive statistics of each RHS variable over (a) distance and (b) elevation for each catchment with smooth loess lines to indicate trend. Network topology metrics are normalised between 0 and 1 and HMS score is logarithmically transformed for display purposes.

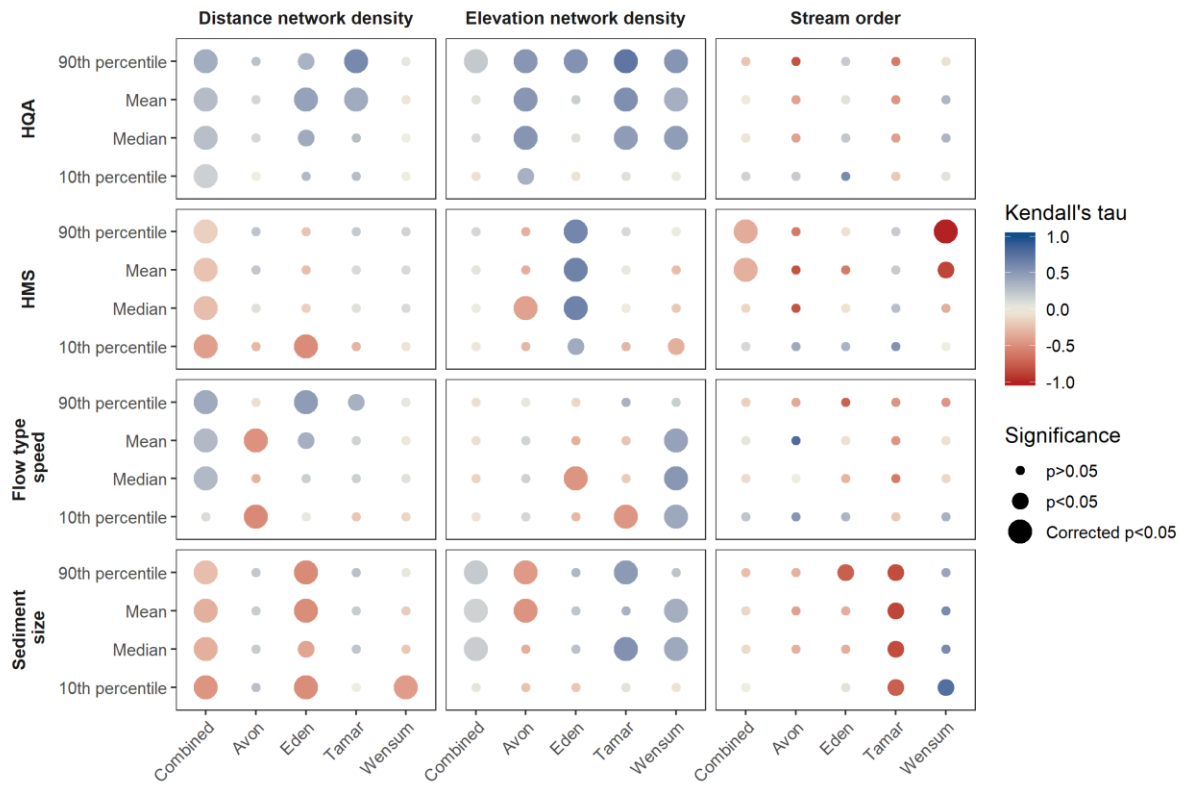

**Figure 4.** Summary of correlations between distance network density, elevation network density, stream order and RHS variables for all catchments combined and each individual catchment. Significance of correlation is indicated by point size with the largest points significant post p-value correction. Effect size (Kendall's tau) is indicated by colour. No correlation was possible between stream order and 10<sup>th</sup> percentile sediment size in the Avon due to no variation in the RHS variable.

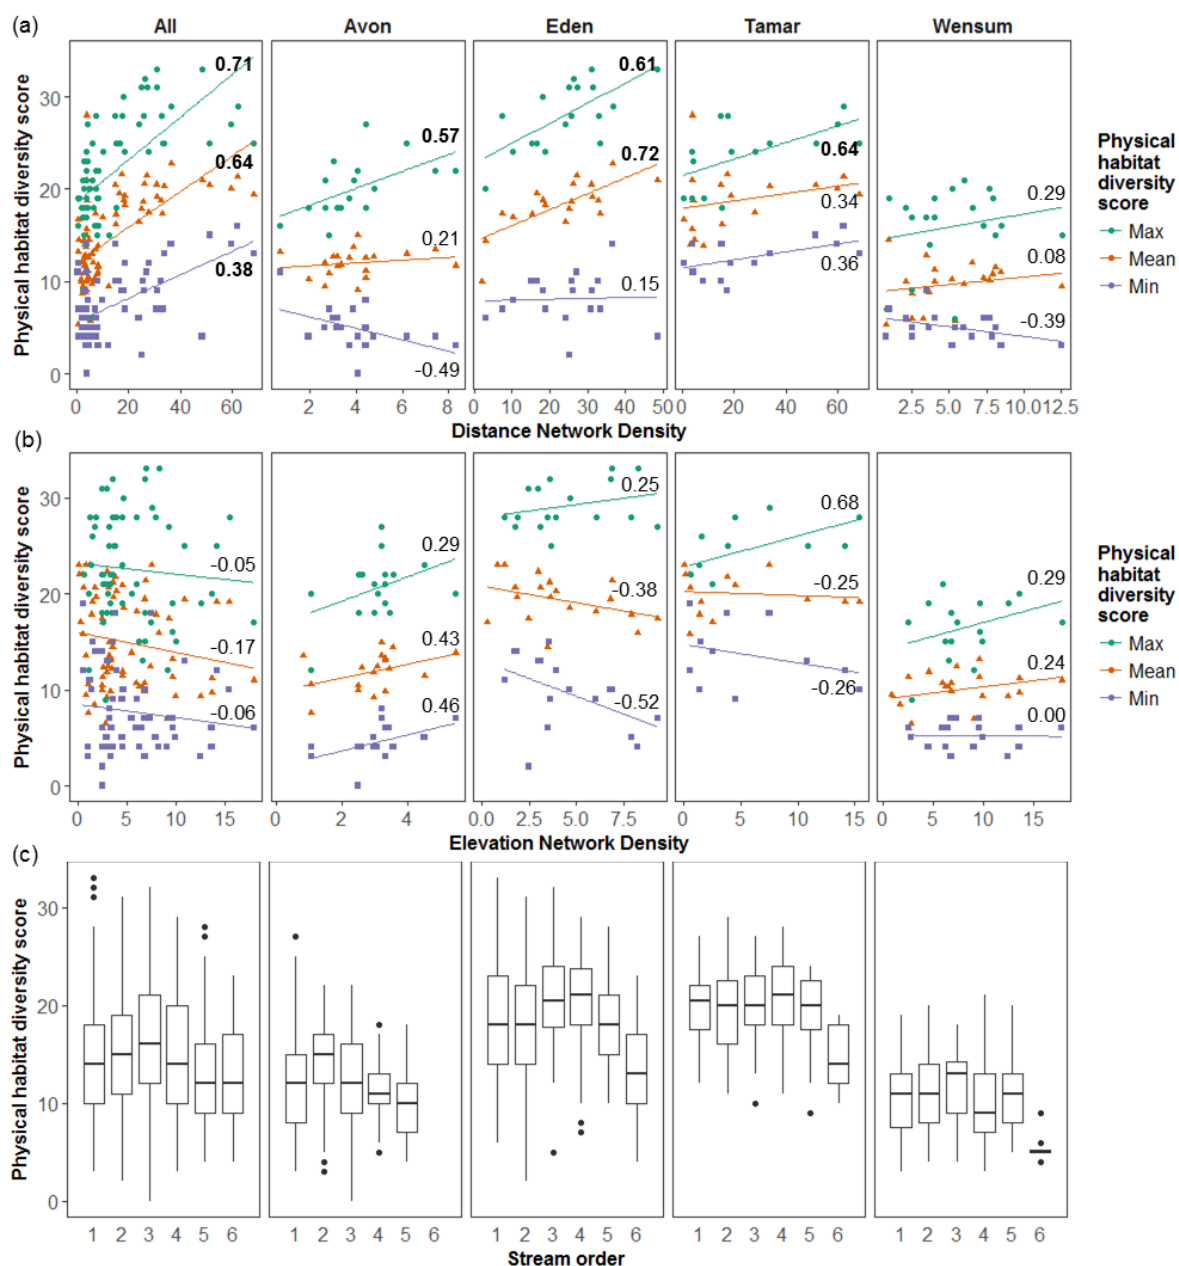

**Figure 4. Relationships between network topology metrics and physical habitat diversity score in All catchments combined and each individual catchment. (a) Spearman's Rho correlations between mean, maximum and minimum habitat diversity and Distance network density. (b) Spearman's Rho correlations between mean, maximum and minimum habitat diversity and Elevation network density. Significant correlation coefficients ( $p < 0.05$ ) shown in bold. (c) Physical habitat diversity score distributions for stream orders.**

**Table 1.** ~~RHS variables calculated from RHS observations. RHS components used in the physical habitat diversity score. Each component reflects physical habitat properties. Individual component scores are assigned based on dominant features observed at 10 spot checks along the 500m reach and reflect the diversity of the component within the reach.~~

| <u>RHS Variable</u>                     | <u>Calculation from RHS observations</u>                                                                                                                                                                                                                                                                                                                                                                                                                | <u>Units</u>                 |
|-----------------------------------------|---------------------------------------------------------------------------------------------------------------------------------------------------------------------------------------------------------------------------------------------------------------------------------------------------------------------------------------------------------------------------------------------------------------------------------------------------------|------------------------------|
| <u>Habitat quality Assessment (HQA)</u> | <u>A score indicating the degree of naturalness and diversity of the riparian zone based on observations in the reach of flow types, substrate, channel and bank features, riparian vegetation etc.</u>                                                                                                                                                                                                                                                 | <u>HQA scale</u>             |
| <u>Habitat Modification Score (HMS)</u> | <u>A score indicating the degree of artificial modification of the channel based on observations in the reach of reinforcements, re-sectioning, embankments, weed-cutting, realignment, culverts, dams, weirs etc.</u>                                                                                                                                                                                                                                  | <u>HMS scale</u>             |
| <u>Sediment size</u>                    | $= \frac{(-8 \cdot BO - 7 \cdot CO - 3.5 \cdot GP - 1.5 \cdot SA + 1.5 \cdot SI + 9 \cdot CL)}{(BO + CO + GP + SA + SI + CL)}$ <p><u>BO (boulder), CO (cobble), GP (gravel-pebble), SA (sand), SI (silt) and CL (clay) represent the number of spot checks allocated to each sediment size class</u></p>                                                                                                                                                | <u>Approx. phi units</u>     |
| <u>Flow type speed</u>                  | $= \frac{(0 \cdot DR + 1 \cdot NP + 2 \cdot UP + 3 \cdot SM + 4 \cdot RP + 5 \cdot UW + 6 \cdot BW + 7 \cdot CF + 8 \cdot CH + 9 \cdot FF)}{(DR + NP + UP + SM + RP + UW + BW + CF + CH + FF)}$ <p><u>DR (dry), NP (no perceptible flow), UP (upwelling), SM (smooth), RP (rippled), UW (unbroken wave), BW (broken wave), CF (chaotic flow), CH (chute), FF (free-fall) represent the number of spot checks allocated to each flow speed class</u></p> | <u>Flow type speed scale</u> |

| <del>RHS component</del> | <del>Physical habitat properties</del> | <del>Features recorded</del> | <del>Component score calculation (Raven et al., 1998)</del> |
|--------------------------|----------------------------------------|------------------------------|-------------------------------------------------------------|
|--------------------------|----------------------------------------|------------------------------|-------------------------------------------------------------|

|                         |                                                                                                             |                                                                                                                            |                                                                                                                                                                                                                                                                                                             |
|-------------------------|-------------------------------------------------------------------------------------------------------------|----------------------------------------------------------------------------------------------------------------------------|-------------------------------------------------------------------------------------------------------------------------------------------------------------------------------------------------------------------------------------------------------------------------------------------------------------|
| <i>Flow type</i>        | Flow types represent biotopes which reflect the habitat of the entire biological community (Udvardy, 1959). | Free fall, chute, broken standing waves, unbroken standing waves, chaotic, rippled, upwelling, smooth, no perceptible flow | <del>Score 1</del> for each flow type recorded. <del>Score 2</del> if it occurs at 2-3 spot checks. <del>Score 3</del> if it occurs at 4+ spot checks <del>or</del> if only one type occurs at all 10 spot checks. <del>Score 0</del> if channel is dry. (Additional scores available from sweep-up survey) |
| <i>Substrate size</i>   | Substrates of different sizes provide a functional habitat for different species (Harper et al., 1992)      | Bedrock, boulder, cobble, gravel/pebble, sand, silt, clay, peat                                                            | <del>Score 1</del> for each substrate type recorded <del>or</del> if substrate is not visible in 6+ spot checks. <del>Score 2</del> if it occurs at 2-3 spot checks. <del>Score 3</del> if it occurs at 4+ spot checks <del>or</del> if only one type occurs at all 10 spot checks                          |
| <i>Channel features</i> | Erosional and depositional features reflect the stability of the channel (Bizzi and Lerner, 2015)           | Exposed bedrock/boulders, unvegetated mid-channel bar, vegetated mid-channel bar, mature island                            | <del>Score 1</del> for each channel feature recorded. <del>Score 2</del> if it occurs at 2-3 spot checks. <del>Score 3</del> if it occurs at 4+ spot checks (Additional scores available from sweep-up survey)                                                                                              |

900

905
